1 **IFITM proteins inhibit HIV-1 protein synthesis**

2  
3 Wing-Yiu Jason Lee<sup>1</sup>, Chen Liang<sup>2</sup> and Richard D Sloan<sup>1,3,4\*</sup>

4  
5 <sup>1</sup>Blizard Institute, Barts and The London School of Medicine and Dentistry, Queen Mary University of  
6 London, London E1 2AT, United Kingdom. <sup>2</sup>McGill University AIDS Centre, Lady Davis Institute,  
7 Montreal, Quebec H3T 1E2, Canada. <sup>3</sup>Division of Infection and Pathway Medicine, School of Biomedical  
8 Sciences, University of Edinburgh, Edinburgh EH16 4SB, United Kingdom. <sup>4</sup>ZJU-UoE  
9 Institute, Zhejiang University, Haining, Zhejiang 314400, P.R. China. (\*corresponding author).

10 E-mail: [jason.lee@qmul.ac.uk](mailto:jason.lee@qmul.ac.uk), [chen.liang@mcgill.ca](mailto:chen.liang@mcgill.ca), [richard.sloan@ed.ac.uk](mailto:richard.sloan@ed.ac.uk)

11  
12 **Keywords:** Retrovirus, human immunodeficiency virus (HIV), interferon, translation, viral replication.

13 **Abstract**

14 Interferon induced transmembrane proteins (IFITMs) inhibit the cellular entry of a broad range of viruses,  
15 but it has been suspected that for HIV-1 IFITMs may also inhibit a post-integration replicative step.

16 We show that IFITM expression reduces HIV-1 viral protein synthesis by preferentially excluding viral  
17 mRNA transcripts from translation and thereby restricts viral production. Codon-optimization of proviral  
18 DNA rescues viral translation, implying that IFITM-mediated restriction requires recognition of viral  
19 RNA elements. In addition, we find that expression of the viral accessory protein Nef can help overcome  
20 the IFITM-mediated inhibition of virus production. Our studies identify a novel role for IFITMs in  
21 inhibiting HIV replication at the level of translation, but show that the effects can be overcome by the  
22 lentiviral protein Nef.

24 **Background**

25 Viruses must replicate in cells; the consequence of such dependence is susceptibility. Cells have thus  
26 evolved a series of antiviral factors that directly subvert viral replication. Recent work has revealed the  
27 striking scale of antiviral mechanisms employed by cells - almost every step of viral replication is  
28 apparently targeted by host encoded antiviral factors. For HIV the best defined examples are  
29 APOBEC3G/3F and SamHD1 that inhibit viral reverse transcription, TRIM5 $\alpha$  that targets viral capsid  
30 uncoating, and tetherin that prevents viral egress (reviewed in <sup>1,2</sup>). However, genomic and proteomic  
31 screens can aid identification of further antiviral factors, and so there is an expanding list being described  
32 <sup>3,4</sup>. Such studies identified the MxB/Mx2 protein that targets HIV-1 replication around nuclear entry <sup>5,6</sup>,  
33 and the SERINC3 and SERINC5 proteins that target HIV-1 entry <sup>7,8</sup>.

34 The interferon induced transmembrane proteins (IFITMs) have been similarly identified in multiple  
35 independent screens as antiviral factors <sup>9-12</sup>. Humans have three antiviral IFITMs - IFITM1, IFITM2 and  
36 IFITM3 (reviewed in <sup>13</sup>). IFITM expression inhibits viral entry into cells <sup>9,10</sup>, a phenotype that is enhanced  
37 by incorporation of IFITM proteins into viral particles <sup>14-16</sup>. Inhibition of viral entry is thought to occur via  
38 IFITM-mediated changes in the physical characteristics of the host cell membrane thereby inhibiting  
39 virus-cell membrane fusion <sup>17</sup>, though other inhibitory mechanisms affecting entry have been proposed <sup>18</sup>.  
40 By employing this generic inhibitory mechanism, IFITMs can then inhibit the entry of a broad range of  
41 viruses including influenza A virus, hepatitis C virus, Ebola virus, SARs coronavirus, Dengue virus, Zika  
42 virus, and HIV-1 <sup>9,10,19-21</sup>.

43 Yet since the discovery of their antiviral effect upon HIV-1, it was immediately apparent that a viral  
44 replication step downstream of host genome integration might also be inhibited by IFITM proteins, as  
45 IFITM1 knockdown increased HIV-1 titres from infected CD4<sup>+</sup> T-cells <sup>10</sup>. In the same study, IFITM1  
46 inhibited the replication of HIV-1 in T-cell culture despite the evidence that IFITM1 had no effect on  
47 viral replication steps from cell entry to host genome integration for the viral strain used. Other studies  
48 have also noted IFITM1-3 expression reduces viral particle production from cells <sup>12,14-16,22-26</sup>. When this

*IFITMs inhibit HIV-1 protein synthesis*

49 occurs, IFITM expression is typically associated with reductions in HIV-1 Gag levels, implying a block in  
50 viral protein synthesis.

51 Despite the frequency of these observations, there has been little to no attempt to explain them. Why viral  
52 production should be affected by IFITM expression is unclear. We therefore sought to investigate the  
53 potential block in protein synthesis induced by IFITMs and now show that IFITM expression leads to an  
54 inhibition of lentiviral production, which for HIV-1 occurs due to specific exclusion of viral mRNA from  
55 polysomes. Yet we also find that expression of the lentiviral accessory protein Nef can help relieve the  
56 inhibition in virus production, allowing HIV-1 to better replicate in the presence of IFITM proteins. Thus  
57 IFITM proteins are able to inhibit HIV-1 replication through three distinct processes - inhibition of viral  
58 entry, reduction of viral particle infectivity, and inhibition of viral protein synthesis.

59

60 **Results**

61 *IFITMs inhibit HIV-1 production*

62 We first wanted to confirm if IFITMs affect the production of HIV from virus producing cells as noted in  
63 previous reports<sup>10,12,14-16,22-26</sup>. We used a co-transfection scheme in which we co-transfected HEK293T  
64 cells with plasmids containing HIV-1 proviral DNAs together with expression vectors encoding human  
65 IFITM1-3, allowing the effects on virus production to be studied independently of effects of IFITM  
66 proteins on viral entry. The quantity of virus produced was then analyzed by supernatant p24 ELISA and  
67 reverse transcriptase activity assays. Increasing levels of IFITM expression decreased HIV-1 NL4-3  
68 output by in a concentration-dependent manner consistent with loss of intracellular p55 and p24 levels  
69 (Figure 1A, 1B), with a similar decrease seen in supernatant when both p24 concentration (Figure 1C) and  
70 reverse transcriptase activity (Figure 1D) were measured. Notably, the expression of IFITM1 and IFITM2  
71 reduced the HIV-1 output while the effect was weaker for IFITM3. We then studied the effect of IFITMs  
72 on other viral proteins, and found IFITM1 and IFITM2 expression led to a reduction in the levels of all  
73 HIV-1 NL4-3 proteins assayed in transfected cells (Figure 1E). Similar to HIV-1 NL4-3, viral production

*IFITMs inhibit HIV-1 protein synthesis*

74 from the HIV-1 plasmid proviral DNAs 89.6 and Indie-C1 was also reduced by IFITM expression (Figure  
75 1C and D).

76 In addition to HIV-1, the expression of IFITMs also reduced the quantity of virus produced from cells  
77 transfected with plasmid proviral DNAs for HIV-2 and SIVs (Figure S1A and S1B). Of note, HIV-2<sub>ROD</sub>  
78 and SIV<sub>AGM</sub> appeared to be less susceptible to this IFITM-mediated effect compared to the HIV-1 viruses  
79 studied. We also found similar inhibitory effects upon HIV-1 with transfected African Green Monkey  
80 IFITM1 (Figure S1C).

81 We were concerned however that the loss of viral production we saw might be due to generic inhibition of  
82 protein production during IFITM expression, but detection of GFP from a transfected reporter plasmid  
83 was not significantly affected by IFITM expression (Figure 1F). We also measured the infectivity of the  
84 virus produced from IFITM-expressing cells, in TZM-bl cells and showed that virus produced have lower  
85 infectivity (Figure 1G), in agreement with previous results<sup>14-16</sup>.

86 We noted that levels of IFITM proteins in transfected 293T cells were often higher than those seen in  
87 type-I interferon treated CD4<sup>+</sup> T-cells and monocyte derived macrophages (MDMs) (Figure S2) and so  
88 we next investigated the influence of IFITM proteins in cells in which levels of expression could be  
89 inducibly expressed. While we also wanted to test if IFITMs inhibit viral production in infected cells  
90 rather than provirus transfected cells. As such we infected SupT1 cells expressing doxycycline inducible  
91 IFITM1-3 with wild type NL4-3 virus<sup>10</sup>. To avoid the well documented inhibition of virus entry by  
92 IFITMs playing a role in our experiments, after spinoculation, unbound virus was washed off and cells  
93 were resuspended in new medium containing doxycycline and the CXCR4 antagonist AMD3100 to  
94 induce IFITM expression only after virus entry and to limit viral replication to a single round  
95 respectively. Complete entry blockade was confirmed with pre-treatment of cells (Figure S2A). The  
96 quantity of wild type HIV-1 produced by IFITM-expressing T-cells was inhibited across a range of viral  
97 inputs and was paired with losses in all viral protein levels, but with p55 levels somewhat less affected  
98 (Figure 2B). Though collectively this indicates that IFITMs inhibit viral production independent of their

*IFITMs inhibit HIV-1 protein synthesis*

99 effects on viral entry. Notably, the levels of doxycycline induced IFITM were similar to those found in  
100 type I interferon treated CD4<sup>+</sup> T-cells and monocyte derived macrophages (Figure S2B, C and E).  
101 We next wished to investigate this effect using knockdown of endogenous IFITM levels to avoid  
102 overexpression artefact, and to assess the relative contribution of IFITMs towards inhibition of viral  
103 production that is observed with type I interferon (IFN) treatment. We therefore analyzed viral output  
104 from HIV-1 NL4-3 plasmid proviral DNA transfected and IFN- $\beta$  treated TZM-bl cells that had been  
105 transduced with shRNAs targeting different IFITMs<sup>27</sup>. Infection of cells with virus produced during  
106 transfection was inhibited through the use of the CXCR4 antagonist AMD3100, and thus the level of viral  
107 output in our analysis cannot be confounded by entry inhibition due to IFITM expression. The efficiency  
108 of knockdown in IFITM expression was confirmed by immunoblotting using monoclonal antibodies  
109 specific for individual IFITMs (Figure 3A). As anticipated, IFN- $\beta$  treatment reduced viral production in  
110 HIV-1 transfected TZM-bl cells (Figure 3B). Despite some weak knockdown cross-reactivity, such that  
111 shRNA targeting IFITM1 caused weak knockdown of IFITM2 (Figure 3A), and that it was not possible to  
112 knockdown IFITM3 in isolation, knockdown of both IFITM1 and IFITM2 clearly rescued the level of  
113 virus produced in IFN- $\beta$  treated cells (Figure 3C). Further, knockdown of all three IFITMs gave a higher  
114 rescue, indicating that the inhibitory effects of IFITM1 and IFITM2 on viral production are perhaps non-  
115 redundant in the context of HIV-1 replication. These effects were paired with rescue of all viral proteins  
116 levels during IFITM knockdown (Figure 3D and 3E). Knockdown of IFITMs rescued viral protein  
117 production by around 1.5 to 3.5 fold, and so is concordant with viral production rescue of 2.0 to 2.5-fold.  
118 These data then show that endogenous levels of IFITMs can inhibit viral particle output and that our prior  
119 results in 293T transfections and SupT1 infections are not an overexpression artefact. They also suggest  
120 that IFITMs are a significant component of the antiviral response induced by type I interferon.  
121 We next sought to confirm if the knockdown of physiologically relevant levels of IFITMs in HIV-1  
122 infected primary cells could rescue viral protein production. Primary human CD4<sup>+</sup> T cells were infected  
123 with HIV-1 following transduction with lentiviral particles for the expression of shRNAs targeting  
124 different IFITMs. Transduction with one shRNAs resulted in a specific ~90% downregulation of IFITM2,

*IFITMs inhibit HIV-1 protein synthesis*

125 while another shRNA led to a ~50% downregulation of all three IFITMs (Figure 4A-C). We were unable  
126 to specifically knockdown IFITM1 with reasonable efficiency. To mitigate the effects of IFITMs  
127 inhibiting viral entry on our studies of inhibited viral production, we took advantage of recent  
128 observations showing that different IFITM proteins vary in their inhibition of viral entry depending on  
129 HIV-1 co-receptor usage<sup>16,22,28</sup>. IFITM1 inhibits entry of CCR5-tropic viruses and IFITM2/3  
130 predominantly inhibits CXCR4-tropic viruses. We therefore studied viral production effects driven by  
131 IFITM2 and IFITM3 with dual-tropic HIV-1 89.6, wherein cells were treated with the CXCR4 antagonist  
132 AMD3100 prior to and during infection. AMD3100 treatment would direct viral entry via CCR5 due to  
133 CXCR4 blockade and thus mitigate entry inhibition by either IFITM2 or IFITM3. We used intracellular  
134 p24 staining of infected cells in single cycle infections to measure uptake of virus after infection with  
135 trypsin treatment to remove cell surface bound virus<sup>29-31</sup>. Although cellular uptake of viral p24 is not an  
136 exact measure of virus entry due to the uptake of virus into potentially non-productive endocytic  
137 pathways, p24 uptake is commonly found to be inhibited by IFITM expression<sup>14,15,24,25</sup>, while endocytic  
138 uptake of virus occurs at a lower rate in primary CD4<sup>+</sup> T-cells<sup>32</sup>. We confirmed that viral uptake was  
139 minimally impeded with these during IFITM knockdown (Figure 4D and E), consistent with prior  
140 observations<sup>28</sup>. Therefore reductions in virus production were considered to arise predominantly from  
141 IFITM-driven effects other than inhibition of viral entry. As such knockdown of IFITM2 led to a clear  
142 rescue of viral particle output (7-fold) that was coupled with rescue in viral protein expression (Figure  
143 4F,G). Similarly, knockdown of IFITM1-3 led to rescue of viral protein production and viral particle  
144 output (>10-fold) (Figure 4F, G and H). Though as IFITM1 which was depleted in this experiment can  
145 inhibit R5-tropic virus entry, a proportion of this latter result for IFITM1-3 may be attributable to weak  
146 IFITM1 driven entry inhibition. That this effect was very weak (Figure 4F and G) suggests that viral  
147 production inhibition may be the dominant form of IFITM driven inhibition in this experiment. Overall,  
148 this confirms that physiologically relevant levels of IFITM proteins can clearly inhibit HIV-1 production  
149 in primary cells independent of their effects upon entry and infectivity, that this is not an overexpression  
150 artefact, and occurs in a manner that is consistent with our observations in cell lines.

151

152 *IFITMs restrict HIV-1 protein synthesis*

153 As we found that IFITM expression was associated with losses in viral protein production and viral  
154 output, we next asked if IFITMs play a role in inhibiting the transcription or stability of viral mRNA by  
155 analyzing the level of unspliced, singly-spliced, and multiply-spliced transcripts detected by RT-qPCR  
156 from total RNA of whole cell lysates. IFITM1 and IFITM2 weakly reduced the levels of singly-spliced  
157 and multiply-spliced transcripts, while IFITM3 had no measureable effect (Figure 5A). The total level of  
158 unspliced transcripts remained unaffected in the presence of IFITM proteins (Figure 5A) but nonetheless  
159 there were reductions of intracellular level of Gag (a product of unspliced transcripts) in our prior  
160 analyses (Figures 1-4). This prompted us to investigate if IFITM proteins affect translation of viral  
161 transcripts.

162 To achieve this we performed a polysome analysis for HIV-1 transcripts during IFITM expression. We  
163 first analyzed the RNA content in cell lysates fractionated on a sucrose gradient by ultracentrifugation.  
164 The total RNA profiles (Figure 5B) RNA recovered from selected fractions of virus producing cells  
165 expressing IFITMs are comparable to vector-transfected control, suggesting that IFITM expression did  
166 not alter global translation in the cell. We used the level of ribosomal protein L7 as a guide for selection  
167 of fractions in our analysis (Figure 5C) as it is a component of 60S ribosomes, which are enriched in 80S  
168 monosomes (such as fraction 10 Figure 5C) as well as polysomes (such as fractions 14-18. The levels of  
169 GAPDH mRNA were not reduced in polysome fractions. Reductions in the levels of viral transcripts in  
170 polysome fractions (in contrast to whole cell lysates – Figure 5A) would indicate specific translational  
171 inhibition. As such, we analyzed the level of viral transcripts in selected fractions covering the whole  
172 RNA profile with RT-qPCR.). IFITM1 and IFITM2 significantly reduced the level of unspliced and  
173 singly-spliced viral transcripts in polysomes (Figure 5E and F) and increased the level of these transcripts  
174 in the ribosome-free fraction (fraction 6), suggesting that expression of IFITM1 and IFITM2 inhibited  
175 translation of these viral transcripts. IFITM1 and IFITM2 also appeared to somewhat reduce the level of  
176 multiply-spliced transcripts (Figure 5G), though the effect did not reach statistical significance, but was

*IFITMs inhibit HIV-1 protein synthesis*

177 nonetheless coupled with a clear accumulation of ribosome-free multiply-spliced transcripts in low  
178 concentration sucrose fraction (Figure 5G - fraction 6) relative to vector control, similar to other viral  
179 transcript classes. These data were consistent with our analysis of viral production (Figure 1) wherein  
180 IFITM1 and IFITM2 expression lead to a more potent block in viral production than for IFITM3. Thus  
181 IFITM proteins inhibit translation of HIV-1 transcripts by leading to their specific exclusion from  
182 polysomes, resulting in reduced levels viral proteins and reduced viral output.

183

184 *HIV-1 RNA is a determinant of IFITM-mediated restriction of protein synthesis*

185 To better understand how IFITM proteins help suppressing viral translation, we explored the possibility  
186 that they may be involved in a process that is able to distinguish viral RNA from cellular RNA. To  
187 address this, we measured the level of unspliced viral RNA transcripts in the polysome fraction of  
188 HEK293T cells transfected with a codon-optimized vector for HIV-1 NL4-3 Gag only<sup>33</sup> in conjunction  
189 with IFITM-expression vectors. Codon-optimization changes the codon bias of the construct towards and  
190 therefore also alters the secondary structures of viral RNA. Changing codon bias thus renders HIV-1  
191 unspliced and singly-spliced transcript expression independent of the HIV Rev responsive element  
192 (RRE), a *cis* acting RNA structure necessary for transcript nuclear export<sup>34</sup>. Codon optimization of *gag*  
193 rescued the level of unspliced HIV-1 transcripts in polysomes during IFITM expression, nor was there an  
194 accumulation of transcripts in low sucrose fractions as was seen with wild type NL4-3 (fraction 7 in  
195 Figure 6A compared to fractions 6 in Figure 5E, F and G). As a result, the level of extracellular p24  
196 production from cells expressing IFITM1 and IFITM2 was not only rescued but enhanced, and the  
197 production of the *gag* products p55 and p24 was also restored (Figure 6B, C and F). Notably p24 protein  
198 production was only partially rescued, but p55 was entirely rescued (Figure 6F). Contrasting data for full  
199 length pNL4-3 DNA show clear losses of viral production and protein expression in similar experiments  
200 (Figure 6D, E and F).

201 We then sought to identify specific RNA features that may render HIV-1 susceptible to an IFITM-driven  
202 translational block. As our findings of transfected HEK293T cells showed that unspliced and singly-



*IFITMs inhibit HIV-1 protein synthesis*

203 spliced viral transcripts are more readily excluded from polysomes by IFITM proteins than multiply-  
204 spliced transcripts in those cells (Figure 5), we reasoned that RRE, which is present in only unspliced and  
205 singly-spliced transcripts may be somehow recognized during IFITM protein expression leading to  
206 translational inhibition. To address this, we exploited constructs in which singly-spliced and unspliced  
207 transcripts had been rendered RRE and Rev independent via the introduction of the Mason Pfizer Monkey  
208 Virus (MPMV) constitutive transport element (CTE)<sup>35</sup>. A modification which allows all transcripts to be  
209 exported from the nucleus by the cellular TAP/NXT1 pathway, rather than RRE bearing Rev-dependent  
210 transcripts exporting via the CRM1 pathway<sup>36</sup>. We found that CTE dependent Rev independent virus was  
211 still inhibited by IFITM proteins (Figure S3), demonstrating at least that nuclear export pathway does not  
212 affect the virus production inhibition seen with IFITM proteins. Further introduction of the RRE into CTE  
213 bearing constructs did also not augment the restriction.

214 Overall, these data suggest that the restriction of translation by IFITMs occurs at the RNA level, though it  
215 is not clear that the RRE plays a significant role in susceptibility, despite that RRE bearing transcripts are  
216 more affected in translation. Therefore some other distinguishing feature of viral transcripts or translation  
217 determines their susceptibility to IFITM proteins.

218

219 *HIV Nef can help overcome IFITM-mediated restriction of virus production*

220 Under the selective pressure of cellular restriction factors, retroviruses have evolved to counteract  
221 surveillance and restriction by host antiviral factors (reviewed in<sup>1</sup>). We therefore sought to investigate if  
222 HIV is able to counteract the restriction of viral production by IFITM proteins. We reasoned that HIV-1  
223 Nef may influence this process. IFITMs are membrane proteins and lentiviral Nef regulates the trafficking  
224 of many membrane proteins such as CD4, MHC-I and tetherin to aid immune evasion and viral  
225 replication<sup>37-39</sup>. Further, the expression of a dominant negative form of HIV-1 Nef<sup>40</sup>, or *nef* deletion has  
226 previously been linked to deficits in viral production<sup>41</sup>.

227 We therefore measured the level of virus production in HEK293T cells transfected with expression  
228 vectors of IFITMs with wild type or *nef*-deleted HIV-1 NL4-3 proviral DNA. The level of *nef*-deleted

*IFITMs inhibit HIV-1 protein synthesis*

229 virus produced was inhibited 18-fold by IFITM1, 21-fold by IFITM2 and 5-fold for IFITM3, suggesting a  
230 4-fold enhancement of virus production due to HIV-1 Nef during IFITM1 and IFITM2 expression (Figure  
231 7A). We confirmed a significant reduction in HIV-1 Gag (p55) levels in cells producing *nef*-deleted virus  
232 while IFITMs are expressed (Figure 7B, S4B), indicating that Nef may rescue the translational  
233 suppression driven by IFITMs. As these data were generated through transfection, they were independent  
234 of any influence of Nef upon viral entry<sup>7,8</sup>. It is also of note that exogenous IFITM levels were not  
235 reduced by HIV-1 Nef, perhaps indicating that antagonism of IFITM proteins may not occur via  
236 degradation (Figure 7B).

237 We next investigated if Nef presented an advantage to viral growth in infected T-cells. We infected  
238 SupT1 cells with either wild type or *nef*-deleted NL4-3 virus by post-entry induction of IFITM expression  
239 via doxycycline (Figure 7C). As *nef*-deleted virus has an inherent growth defect, we normalized the  
240 quantity of wild type and *nef*-deleted virus produced from IFITM-induced cells to vector control cells. We  
241 chose to induce IFITMs after X4-tropic HIV-1 NL4-3 entry and limit infections to a single round through  
242 the use of the CXCR4 antagonist AMD3100 after infection to mitigate the influence of IFITMs upon viral  
243 entry. In this regard, we found that *nef*-deleted virus was no more susceptible to IFITM-mediated  
244 restriction of entry than wild type virus (Figure S4A). Compared to wild type virus, production of *nef*-  
245 deleted virus in infected SupT1 cells was reduced significantly during IFITM expression, surprisingly  
246 IFITM3 showed the greatest degree of rescue in SupT1 cells (Figure 7C), in contrast to data for  
247 transfected 293T cells (Figure 7A and B).

248 To further confirm the role of IFITM1 in suppressing virus production in T cells, we monitored the  
249 production of either wild type or *nef*-deleted HIV-1 NL4-3 virus in multiple cycle infections in a C8166  
250 T-cell line transduced to constitutively over-express IFITM1. As IFITM1 does not typically affect the  
251 entry of CXCR4-tropic virus such as NL4-3 (Figure 4A, B and<sup>10,28</sup>), any difference in replication  
252 measured between wild type and *nef*-deleted virus could only arise from IFITM1-mediated effects on  
253 viral production, not cell entry. Therefore this experiment was not pursued for IFITM2 and IFITM3, as  
254 their constitutive expression would inhibit NL4-3 virus entry and complicate interpretation. We found that

*IFITMs inhibit HIV-1 protein synthesis*

255 in the presence of IFITM1, the growth of *nef*-deleted virus was significantly reduced relative to wild type  
256 virus, with wild type virus showing 2-fold inhibition at 5 days post-infection, while *nef*-deleted virus was  
257 inhibited 5-fold by IFITM1 (Figure 7D). As wild type and *nef*-deleted virus data in C8166 cells were  
258 individually normalized to the same viruses in C8166 vector control cells, the differences observed are  
259 not likely due to Nef overcoming SERINC3/5 expression<sup>7,8</sup>, as these factors would be similarly present in  
260 both cell lines. Interestingly, the benefit of Nef expression in the context of IFITM1 was lost in the later  
261 stages of viral culture, when cell-to-cell infection typically predominates<sup>42</sup>. As *nef*-deleted virus was no  
262 more susceptible to IFITM-mediated restriction of entry than wild type virus (Figure S4A), these findings  
263 are only due to the influence of Nef to partially rescue virus production as seen in 293T cell transfections  
264 and SupT1 infections (Figure 7A-C).

265 We then investigated if Nef from other lentiviruses was able to overcome IFITM-mediated inhibition of  
266 protein synthesis using an HIV-1 NL4-3 plasmid proviral DNA into which lentiviral *nef* alleles had been  
267 substituted<sup>43</sup>. The level of virus production for HIV-1 NL4-3 bearing other *nef* alleles during IFITM  
268 expression was generally comparable to levels for wild type NL4-3 *nef* (Figure 7E), indicating that ability  
269 of lentiviral Nef proteins to overcome IFITM mediated restriction of virus production is common.

270 To further confirm the role of Nef in antagonizing IFITMs, we titrated a plasmid bearing NA7 *nef* into  
271 cells transfected with IFITM expression plasmids and *nef*-deleted NL4-3 proviral HIV-1 DNA. Nef  
272 expression *in trans* rescued viral production from IFITM-mediated inhibition in a dose dependent manner  
273 (Figure 7F). However, we note overexpression of Nef in cells transfected with 0.5 $\mu$ g Nef-encoding  
274 plasmid resulted in an overall lower level of viral proteins compared with cells expressing lower levels of  
275 Nef. Interestingly, increased Nef levels helped restore viral production in the context of IFITM expression  
276 (Figure 7F), this rescue was not reflected in viral protein production levels (Figure 7G and S4C),  
277 implying that the ability of Nef to rescue HIV production during IFITM expression does not occur at the  
278 level of protein synthesis. In summary, these data show that Nef can help overcome IFITM-mediated  
279 inhibition of HIV-1 production in a concentration-dependent manner. Taken together, our data

280 demonstrate that HIV-1 Nef is able to help overcome the inhibition of viral protein production exerted by  
281 IFITM proteins and therefore enhance infection.

282

### 283 **Discussion**

284 We report here that IFITM protein restrict HIV-1 by excluding viral mRNA from polysomes thereby  
285 specifically inhibiting protein synthesis. By variously using transfection, post-entry IFITM induction, and  
286 viral co-receptor bypass strategies, we have identified a viral entry independent effect due to IFITMs that  
287 inhibits viral production. Since the discovery of the antiviral effect of IFITM proteins upon HIV-1 entry  
288 and infectivity, there have been data suggesting that there may be a distinct IFITM function directed  
289 towards HIV-1 production<sup>10,12,14,15,22-26</sup>. Despite the relative frequency of these passing observations on  
290 viral production, the underlying processes leading to loss of viral production during IFITM expression  
291 have not been explored.

292 We have demonstrated the breadth of the IFITM-mediated restriction of virus production, identified the  
293 viral replication process that is subverted, and determined a means by which HIV-1 may partially  
294 overcome this effect. In addition, we find that restriction of viral production by IFITM proteins is clear  
295 contributor towards the inhibition of HIV-1 production seen in cells exposed to type I interferon, and have  
296 also shown that inhibition occurs in primary CD4<sup>+</sup> T-cells at physiologically relevant levels of  
297 endogenous IFITM expression. From a mechanistic perspective we have shown that HIV-1 RNA is the  
298 target of this inhibition, though the viral determinant remains elusive. We therefore propose that  
299 inhibition of viral protein synthesis is a genuine antiviral function exerted by IFITM proteins that is  
300 distinct from previously described effects upon entry and infectivity.

301 Initial suggestions of a late-stage IFITM-mediated restriction have typically surrounded two common  
302 laboratory HIV-1 strains, NL4-3 and BH10<sup>10,12,14,25,26</sup>. However, for the putative anti-HIV restriction  
303 factor viperin/RSAD2, analysis demonstrated that the phenotype could not be replicated beyond the  
304 laboratory strain NL4-3<sup>44</sup>. Therefore our demonstration that IFITM proteins restrict production of  
305 multiple HIV-1, HIV-2 and SIVs implies the phenotype we observe is likely not an artefact. This is

*IFITMs inhibit HIV-1 protein synthesis*

306 supported by our finding that African Green Monkey IFITM1 can exert a similar antiviral effect upon  
307 HIV-1 production as occurs with human IFITM1.

308 The general mechanism of restriction we outline is specific exclusion of HIV-1 mRNA from polysomes  
309 during IFITM expression. In HEK293T cells the effect principally occurs with IFITM1 and IFITM2, but  
310 less so for IFITM3 was generally consistent throughout our analysis. Yet inducible expression of IFITM3  
311 in SupT1 cells showed an equivalent antiviral effect to IFITM1 and IFITM2, though, and this was also  
312 linked to viral protein loss and was independent of IFITM-driven effects on viral entry. We consider that  
313 the same translational blocks measured in polysome analysis of HEK293T cells drive the result seen in  
314 SupT1 cells and primary CD4<sup>+</sup> T-cells. Indeed, we considered it very likely cell type specific differences  
315 would occur, as IFITM localization and thus antiviral activity are governed by both ubiquitylation and  
316 palmitoylation<sup>24,45</sup>. Reasonably the degree to which IFITM-driven viral entry inhibition or viral  
317 translation inhibition occurs in particular cells is then influenced by the activity of these pathways, which  
318 are known to commonly vary. Equally, other cell specific factors influencing viral transcription (such as  
319 NFkB translocation) might also account for variation in antiviral activity between cell lines, as higher  
320 virus transcriptional activity may overcome inhibition. However, it is important to note that we were able  
321 to clearly confirm the inhibition of viral production in primary human CD4<sup>+</sup> T-cells by IFITM2 and  
322 IFITM1-3, demonstrating that inhibition of viral production by IFITMs occurs in HIV-1 target cells at  
323 physiologically relevant levels of endogenously expressed IFITM proteins.

324 Why IFITM1 and IFITM2 should act similarly in many instances, when IFITM2 and IFITM3 have closer  
325 amino acid sequence identity and display greater overlap in cellular localization is not yet clear<sup>10,19,46,47</sup>.  
326 IFITM-mediated antiviral effects upon viral entry are principally determined by cellular localization, and  
327 we anticipate the inhibition of protein synthesis to be similar<sup>45,46,48</sup>. This is pertinent for differences we  
328 find between IFITM2 and IFITM3. Despite their high sequence similarity, they typically show distinct  
329 cellular localization.

330 The exclusion of viral transcripts from polysomes mainly seemed to mainly affect unspliced and singly-  
331 spliced transcripts. Yet despite a lack of significance, there was consistent but weaker loss of multiply

*IFITMs inhibit HIV-1 protein synthesis*

332 spliced transcripts from polysome fractions, coupled with multiply-spliced transcript enrichment in low  
333 sucrose fractions. This is perhaps indicative of some degree of multiply-spliced transcript translational  
334 blockage that explains the loss of Nef protein seen throughout our experiments.

335 We saw no change in total unspliced mRNA levels in IFITM expressing cells yet there was modest  
336 depletion of singly-spliced and multiply-spliced mRNA during IFITM1 and IFITM2 expression. Though  
337 this overall depletion of total viral mRNA levels may partially account for some loss of Vpu and Nef  
338 production, polysome analysis additionally demonstrated clear exclusion of these transcript classes from  
339 translation. Why these overall mRNA levels should be reduced is of interest. One possibility is a  
340 transcriptional inhibition or pre-translational degradation, but degradation of mRNAs that have been  
341 inhibited in translation is thought to be common <sup>49</sup>. For example, the antiviral protein ZAP, which  
342 degrades retroviral mRNA has also been shown to stall translation prior to mRNA degradation,  
343 illustrating the fluid link between translational stalling and mRNA stability <sup>50,51</sup>.

344 Susceptibility to inhibition occurred at the level of viral mRNA and we so sought to identify a viral RNA  
345 susceptibility determinant. Our data showing *gag* codon optimization relieves the late-stage IFITM  
346 inhibition of HIV-1 supports similar findings <sup>26</sup>. Singly-spliced and unspliced transcripts that bear the  
347 RRE were typically most affected by IFITMs proteins in our analyses. Yet investigation of proviral  
348 constructs in which the RRE was substituted for the CTE element were inconclusive, making it difficult  
349 to reconcile a role for the RRE in determining inhibition, despite the appealing observation that RRE  
350 bearing transcripts are typically most affected. Notably, RRE bearing transcripts also have a non-human  
351 codon bias and surrounding splice sites that may prove to influence restriction <sup>52-55</sup>. As such further  
352 analysis to identify any HIV-1 RNA determinant of inhibition will then be of much value, though  
353 currently our further attempts to identify the viral RNA determinant have been unsuccessful. A recent  
354 study demonstrated that viral RNA CG dinucleotide frequency drives ZAP-mediated viral restriction,  
355 rather than a specific RNA structural determinants, thus the determinant for IFITM-mediated restriction  
356 of protein synthesis may be similarly obscure <sup>56</sup>. However, we were able to exclude the broader  
357 possibility of general translational arrest via IFITM expression. Other aspects of the mechanism remain

*IFITMs inhibit HIV-1 protein synthesis*

358 elusive also. IFITMs have no reported RNA binding domain and so would require either an RNA-binding  
359 partner to directly achieve inhibition, or would need to be involved in a pathway that could influence  
360 translation in this manner.

361 If IFITMs are cofactors in direct inhibition of viral RNA translation, it is not yet clear how a membrane  
362 protein can affect both soluble protein translation and membrane protein translation, this may ultimately  
363 depend the absolute strictness of translational site partitioning, a concept which is under renewed debate  
364 <sup>57</sup>. Further, typically a proportion of IFITM proteins in cells are not palmitoylated, and show less distinct  
365 membrane localization, conceivably this fraction may be important in influencing translation <sup>45</sup>. One  
366 unexplored possibility is that the capacity of IFITM proteins to disrupt membrane fluidity or other  
367 membrane physical characteristics to inhibition viral-cell membrane fusion <sup>17,58</sup> on the cell surface and in  
368 endosomal compartments similarly affects rough endoplasmic reticulum membranes, leading to a  
369 disruption of membrane bound translational complexes. Though how such a process could be specific to  
370 virus translation is unclear.

371 We demonstrate that the lentiviral protein Nef can help overcome the late-stage inhibition of viral  
372 production exerted by IFITM proteins. Though notably this rescue is not complete. Our data may help  
373 explain accounts of a Nef driven enhancement of HIV-1 production <sup>40,41</sup>. The ability to overcome IFITM-  
374 mediated inhibition of virus production was apparent with all HIV-1, HIV-2 and SIV *nef* alleles tested.

375 Though the underlying mechanism of ability of Nef to counter IFITMs is unclear, we saw no degradation  
376 of IFITMs in the context of viral protein expression. One possible explanation may be re-trafficking,  
377 wherein Nef acts as an adaptor protein to direct IFITMs away from their site of action on translation. This  
378 fits well with the sensitivity of IFITM-mediated antiviral function to changes in IFITM localization <sup>45,46,48</sup>,  
379 but also fits with the ability of Nef to redirect a multitude of membrane proteins from their site of action  
380 <sup>38,39,59,60</sup>. This may be consistent with our observation that Nef rescues virus particle production in  
381 supernatants during IFITM expression, but does not rescue viral protein production.

382 We also found that, in multiple cycle infections, the benefit of Nef expression was only seen early in  
383 culture but was latterly lost. Cell-free infection is prevalent in the early stages of culture, but infection

384 shifts towards a cell-to-cell mode in later stages<sup>42</sup>. It has been proposed that this represents a means of  
385 escape from immune factors in HIV-1; as the high efficiency, high multiplicity of infection associated  
386 with cell-to-cell transmission can overcome restriction<sup>61,62</sup>. For example, with the antiviral restriction  
387 factor tetherin, antiviral effect is either severely weakened or absent during cell-to-cell transmission of  
388 HIV-1<sup>31,63,64</sup>.

389 Thus we conclude that IFITMs are antiviral factors that can target HIV-1 translation. For retroviruses this  
390 seems to be a recurring weak point in replication strategy that the innate immune system has frequently  
391 evolved to target. For example, PKR senses viral double stranded RNA and halts translation<sup>65</sup>, while  
392 Schlaffen 11 inhibits viral protein production by disrupting tRNA synthesis<sup>66</sup>, and finally the protein  
393 ZAP which induces viral mRNA degradation also stalls viral translation<sup>51</sup>.

394 The model we put forward wherein IFITM expression specifically disrupts viral mRNA translation may  
395 be applicable to other targets. Conceptually, other self and non-self RNAs may be affected also. It is then  
396 of interest that a recent report found that LINE-1 retrotransposon mobility could be inhibited by IFITM1  
397 expression<sup>67</sup>, which for a retrotransposon cannot of course arise from viral entry effects. Future  
398 characterization will therefore identify the viral RNA determinant of susceptibility, and the breadth of  
399 antiviral and RNA regulatory response driven by IFITM proteins.

400

## 401 **Methods**

### 402 *Plasmids*

403 Human pQCXIP IFITM1-3 plasmids bearing an N-terminal FLAG were previously described<sup>58</sup>. The viral  
404 construct pBR4-3-eGFP-Nef, encoding for wild type HIV-1 NL4-3, pBR4-3-IeGFP $\Delta$ Nef, HIV-1 NA7,  
405 HIV-1 NL4-3 plasmids carrying *nef* alleles of HIV-2 Ren or CBL and SIV AGM or MAC strains - all  
406 described in<sup>43</sup> - are kind gifts of Professor Frank Kirchhoff (University of Ulm). HIV-2 MCR and MCN  
407 plasmids<sup>68</sup> are kind gifts of Professor Áine McKnight (Queen Mary University of London). pSIV<sub>agm</sub>Tan-  
408 1, pSIV<sub>cpz</sub>Tan1.910 and pSIV<sub>mac</sub>1A11 are from NIH AIDS Reagent Program. Codon-optimized HIV-1



*IFITMs inhibit HIV-1 protein synthesis*

409 NL4-3 is encoded by pCNC-SYNGP<sup>33</sup> (Oxford BioMedica). Plasmids pCTEΔEnvΔRevΔRRE and  
410 pCTEΔEnvΔRev<sup>35</sup> are kind gifts of Professor Paul Bieniasz (Rockefeller University).

411

412 *Antibodies, cells and antiviral compounds*

413 The following antibodies were used to detect IFITMs: human IFITM1 (clone 5B5E2, Proteintech),  
414 IFITM2 (clone 3D5F7, Proteintech) and human IFITM3 (clone EPR5242, Novus Biologicals). Anti-Flag  
415 (clone M2, Sigma) was used to detect FLAG-tagged IFITMs, Rev and GFP. Anti-HIV1 Nef (clone 3F2,  
416 ThermoFisher), rabbit polyclonal anti-Vpu (Abcam) and rabbit polyclonal anti-HIV1 Gag (Abcam) were  
417 used to detect viral proteins. As loading control, β-actin (clone AC74, Sigma) and GAPDH (Abcam)  
418 antibodies were used. Secondary antibodies were horseradish peroxidase conjugated goat anti-  
419 rabbit/mouse IgG. TZM-bl cells expressing shRNAs targeting IFITMs were previously described<sup>27</sup>, as  
420 were SupT1 cells inducible for IFITM expression<sup>10</sup>. Human Embryonic Kidney (HEK) epithelial 293T  
421 cells (HEK293T), C8166 cells, TZM-bl cells, and SupT1 cells were maintained in standard conditions,  
422 and were all originally procured from the NIH AIDS Reagents Program. Primary monocytes and CD4<sup>+</sup> T  
423 cells were isolated from leukocyte cones (NHS Blood Transfusion service, St. George's Hospital,  
424 London) using the human CD14<sup>+</sup> and CD4<sup>+</sup> T cell isolation kits, respectively, according to manufacturer  
425 instruction (Miltenyi Biotec). 0.5x10<sup>6</sup>/ml CD14<sup>+</sup> monocytes were differentiated into macrophages with  
426 100ng/ml GMCSF (PeproTech) at 2-3 days interval until day 7. CD4<sup>+</sup> T cells were activated at 1x10<sup>6</sup>/ml  
427 with T cell activator CD3/CD28 Dynabeads (ThermoFisher), at a bead-to-cell-ratio of 1:1, in complete  
428 medium (RPMI 1640 medium supplemented with 10% heat-inactivated fetal bovine serum, 2mM L-  
429 glutamine, 100U/ml streptomycin, 100U/ml penicillin, all from ThermoFisher) and 30U/ml IL-2  
430 (PeproTech) for 48 hours. AMD3100 and Maraviroc were obtained via the NIBSC AIDS Reagent  
431 Program.

432

433 *Transfections*

*IFITMs inhibit HIV-1 protein synthesis*

434 HEK293T cells were plated at  $2 \times 10^4/\text{cm}^2$  in 48-well plates (for measurements of virus production), 6-well  
435 plates (for measurements of whole cell viral transcripts by qPCR), 10cm dishes (for virus production,  
436 polysome analysis and immunoprecipitation, all from Nunc), 48 hours before transfection. Plasmid DNA  
437 (total quantity of  $1\mu\text{g}/\text{well}$  in 48-well plates,  $3\mu\text{g}/\text{well}$  in 6-well plates and  $5\mu\text{g}/\text{well}$  in 10cm dishes) was  
438 diluted in OptiMEM (ThermoFisher) at 10% volume of total cell culture medium. Equal quantity of  
439 different plasmid DNA was added in co-transfection. Linear polyethylenimine (L-PEI) was added at a  
440 w/w ratio of 5:1 into the diluted DNA. The transfection mixture was incubated at room temperature for 10  
441 minutes before added to cells.

442 For siRNA transfection experiments, HEK293T cells were plated at  $1 \times 10^4/\text{cm}^2$  24 hours prior to  
443 transfection in 48-well plates. siRNAs at a final concentration of 100nM was added to a total of 100 $\mu\text{l}$   
444 OptiMEM, incubated for 5 minutes at room temperature and then 1 $\mu\text{l}$  DharmaFECT 1 (Dharmacon) was  
445 added to diluted DNA. siRNA-transfection mix was incubated for 20 minutes at room temperature and  
446 then added to cells. Expression vectors of IFITMs and HIV-1 proviral DNA were transfected then 48  
447 hours post-transfection.

448 TZM-bl cells were plated at  $6 \times 10^4/\text{cm}^2$  in 48-well plates 24 hours before transfection. In a 48-well format,  
449  $1\mu\text{g}/\text{well}$  plasmid DNA and 6 $\mu\text{l}$  Lipofectamine 2000 (ThermoFisher) were diluted in OptiMEM, incubated  
450 for 10 minutes at room temperature and then added to cells. Medium was replaced with medium  
451 containing  $5\mu\text{M}$  AMD3100 and 100IU/ml IFN- $\beta$  (Peprotech) 4 hours post-transfection.

452 *Intracellular staining and flow cytometry*

453 IFITM expression in IFN $\beta$ -treated human MDMs, CD4<sup>+</sup> T cells, transfected HEK293T cells and  
454 doxycycline-treated SupT1 cells was detected by fixing cells in 4% (w/v) paraformaldehyde (Sigma) in  
455 PBS for 15 minutes at room temperature, followed by permeabilization in 0.2% (v/v) Triton X-100  
456 (Sigma) for 20 minutes at room temperature. Cells were then blocked in 5% BSA in PBS for 1 hour at  
457 room temperature followed by incubation with  $1\mu\text{g}/\text{ml}$  IFITM-specific monoclonal antibodies diluted in  
458 staining buffer (2% BSA/0.1% Triton X-100/PBS) overnight at 4°C. Cells were washed 3 times with 2%  
459 BSA in PBS and labelled with secondary antibodies, human IFITM1, 2 and 3 antibodies were detected by

*IFITMs inhibit HIV-1 protein synthesis*

460 0.5µg/ml goat anti-mouse IgG2a Alexa Fluor 647, goat anti-mouse IgG1 Alexa Fluor 488 and goat anti-  
461 rabbit Alexa Fluor 350, respectively, in staining buffer for 1 hour at room temperature. Labelled cells  
462 were washed 3 times in 2% BSA in PBS and analyzed on LSR II flow cytometer (BD). Data was  
463 analyzed on FlowJo (BD).

464

465 *Infection*

466 HIV-1 virus was produced from transfected HEK293T cells. SupT1 cells were spinoculated with the  
467 indicated concentrations of inoculum for 2 hours at 37 C at 1000x g in 96-well U-bottom plates (Nunc)  
468 followed by incubation at 37 C for 1 hour. Infected cells were then washed 3 times with phosphate-  
469 buffered saline (PBS, Sigma) and re-suspended in medium with 1µg/ml doxycycline (Sigma) and 5µM  
470 AMD3100. C8166 cells were infected with the same protocol without AMD3100. Supernatant was  
471 harvested at the indicated time-points after centrifugation at 500x g for 5 minutes at room temperature.

472

473 *Transduction and infection of primary human CD4<sup>+</sup> T cells*

474 In the presence of CD3/CD28 T-cell activator beads, 5x10<sup>5</sup>/ml activated CD4<sup>+</sup> T cells were transduced  
475 with IFITM-targeting or scrambled shRNA lentivirus with p24 at 100ng/ml for 2 hours at 1000 xg, 37°C  
476 and then for 1 hour incubation. Infected cells were washed three times with PBS, re-suspended in  
477 complete medium with 30U/ml IL-2 and then incubated at 37°C for 48 hours. Prior to HIV infection, T  
478 cell activator beads were removed from transduced CD4<sup>+</sup> T cells. Transduced CD4<sup>+</sup>T cells were then  
479 incubated with medium alone, 5µM Maraviroc or 5µM AMD3100 for 2 hours at 37°C. Untreated cells  
480 and drug-treated cells were then infected with 100ng/ml p24 of NL4-3 or 89.6 virus, respectively, at 37°C,  
481 1000 xg for 2 hours and then incubated for 1 hour. Infected cells were then washed three times with PBS  
482 and re-suspended in complete medium containing 30U/ml IL-2, 5µM Maraviroc and 5µM AMD3100.  
483 Aliquots of infected cells were treated with 0.25% Trypsin/EDTA (ThermoFisher) for 15 minutes at 37°C,  
484 washed three times with PBS, fixed in 2% paraformaldehyde, permeabilized in 0.2% Triton X-100/PBS  
485 and stained with RD-1 conjugated monoclonal mouse anti-HIV-1-p24 (clone KC57, Beckman Coulter)

*IFITMs inhibit HIV-1 protein synthesis*

486 for flow cytometry analysis of internalized virus. Level of viral output in supernatant was measured by  
487 p24 ELISA 72 hours post-infection.

488

489 *p24 ELISA*

490 ELISA plates (Nunc) were pre-coated with 5µg/ml sheep anti-HIV-1 p24 antibody (Aalto Bio Reagents)  
491 at 4 C overnight. Supernatant of transfected HEK293T, TZM-bl cells or infected cells was treated with  
492 1% Empigen BB (Sigma) for 30 minutes at 56°C, then plated at 1:10 dilution in Tris-buffered saline  
493 (TBS) on anti-p24-coated plates and incubated for 3 hours at room temperature. Alkaline phosphatase-  
494 conjugated mouse anti-HIV-1 p24 monoclonal antibody (Aalto Bio Reagents) diluted in 20% sheep  
495 serum, 0.05% v/v Tween-20, TBS (all from Sigma) was then added and incubated for 1 hour at room  
496 temperature. Plates were washed 4 times with 0.01% v/v Tween-20 in PBS and twice with ELISA Light  
497 washing buffer (ThermoFisher). CSPD substrate with Sapphire II enhancer (ThermoFisher) was added  
498 and incubated for 30 minutes at room temperature before chemiluminiscence was read by a plate reader.

499

500 *Reverse transcriptase (RT) activity and luciferase activity assays*

501 Colorimetric reverse transcriptase activity assay kit (Roche) was used to determine reverse transcriptase  
502 activity of HIV-1, HIV-2 and SIV in supernatants of transfected HEK293T cells. Manufacturer  
503 instructions was followed except that supernatant was first treated directly with lysis buffer (50mM Tris  
504 pH7.8, 80mM potassium chloride, 2.5mM DTT, 750µM EDTA and 0.5% Triton X-100, all from Sigma)  
505 for 30 minutes at room temperature and then incubated in streptavidin-coated microplates for 15 hours at  
506 37 C.

507 Luciferase activity of infected TZM/bl cells was analyzed with Bright-Glo luciferase activity kit  
508 following manufacturer instructions (Promega).

509

510 *Polysome profiling*

*IFITMs inhibit HIV-1 protein synthesis*

511 Polysome analysis was performed with both manual fractionation and RNA analysis <sup>69</sup>. Transfected  
512 HEK293T cells were incubated with 100µg/ml cycloheximide (Sigma) for 15 minutes for 37°C and then  
513 washed with ice-cold PBS with 100µg/ml cycloheximide. Cells were then lysed in polysome buffer,  
514 10mM Tris pH8, 140mM NaCl, 1.5mM MgCl<sub>2</sub>, 0.5% v/v NP40, 100µg/ml cycloheximide, protease  
515 inhibitor cocktail (all from Sigma) and 800U/ml RNase OUT (ThermoFisher), for 10 minutes on ice. Cell  
516 lysate was centrifuged at 10, 000x g for 1 minute at 4°C and supernatant was then adjusted to 200µg/ml  
517 cycloheximide and 700µg/ml heparin (Sigma). Following centrifugation at 12, 000x g for 10 minutes at  
518 4°C, an aliquot of supernatant was taken as input and the rest was layered onto a 10% to 50% sucrose  
519 gradient prepared using polysomal buffer. Gradients were then ultracentrifuged at 300,000x g for 16 hours  
520 at 4°C (Sorvall). After centrifugation, 20 550µl fractions were collected from the top of the gradients for  
521 immunoblotting and quantitative PCR analyses. Level of RNA in fractions was measured by absorbance  
522 at 254 nm (Nanodrop) and RNA was precipitated with 5x volume of absolute ethanol (Sigma) overnight  
523 at -20°C.

524

525 *Quantitative PCR*

526 Total RNA of transfected HEK293T cells and precipitated RNA from polysome profiling fractions were  
527 purified with RNeasy mini kit and on-column DNA digestion with RNase-free DNase kit (both from  
528 Qiagen) following manufacturer instructions. 3ng of total RNA per sample was analyzed with Superscript  
529 III Platinum One-Step qRT-PCR kit with ROX (for unspliced and multiply spliced viral transcripts,  
530 ThermoFisher) or QuantiTect SYBR Green PCR kit (for singly-spliced viral transcript, Qiagen) and ABI  
531 7500 Real Time PCR system (Applied Biosystems). Cycling conditions were 50°C C for 15 minutes,  
532 95°C C for 8 minutes, then cycling of 95°C for 15 s and 60°C for 30 s. Reactions carried out in the  
533 absence of reverse transcriptase (Platinum *Taq* only) confirmed the absence of DNA contamination . The  
534 samples were quantified against cloned standards.

535 Primers used to amplify unspliced (Forward, 5'-CCGTCTGTTGTGTGACTCTGG-3', reverse, 5'-  
536 GAGTCCTGCGTCGAGAGATCT-3'), multiply-spliced (Forward, 5'-

*IFITMs inhibit HIV-1 protein synthesis*

537 CAGACTCATCAAGCTTCTCTATCAA-3', reverse, 5'-CTATTCCTTCGGGCCTGTC-3') and singly-  
538 spliced (Forward, 5'-TAATCGGCCGAACAGGGACTTGAAAGCGAAAG-3', reverse, 5'-  
539 CCCATCTCCACAAGTGCTGATACTTC-3') viral transcripts are described in <sup>70</sup>, <sup>71</sup>, and <sup>72</sup>, respectively.  
540 Oligonucleotide probes are labelled with 5'-FAM and 3'-TAMRA, (unspliced, 5'-  
541 TCTAGCAGTGGCGCCCGAACAGG-3' and multiply-spliced, 5'-AACCCACCTCCCAATCCCGAGG-  
542 3', all from ThermoFisher). Cellular GAPDH (glyceraldehyde-3-phosphate dehydrogenase) mRNA was  
543 additionally amplified as a loading control with primers (Forward, 5'-AGGTCGGAGTCAACGG  
544 ATTTGG-3', reverse, 5'-GATGGCAACAATATCCACTTTACCA-3') and probe (5'-  
545 TCTTATTGGGCGCCTGGTCAC-3', as described in <sup>71</sup>.

546

547 *Immunoblotting*

548 Cells were washed once with PBS and then lyzed in radioimmunoprecipitation buffer (RIPA, containing  
549 20mM Tris pH7.5, 150mM NaCl, 1mM EDTA, 1mM EGTA, 1% NP40, 1% sodium deoxycholate,  
550 250μM sodium pyrophosphate, 1mM β-glycerophosphate, 1mM sodium vanadate and protease inhibitor  
551 cocktail, all from Sigma) for 30 minutes at 4°C. Lysate was then centrifuged for 10, 000x g for 10  
552 minutes at 4°C. Protein concentration of supernatant was determined by bicinchoninic acid (BCA) assay  
553 (ThermoFisher). 10μg of protein per sample was analyzed by immunoblotting, developed with ECL  
554 Prime reagents (GE Healthcare Life Sciences) and captured on CL-XPosure films (ThermoFisher) or  
555 ChemiDoc MP system (Bio-Rad). Intensity of immunobands was analyzed by ImageJ (on X-ray films) or  
556 ImageLab (Bio-Rad).

557

558 *Statistical analysis*

559 Levels of viral output in p24 ELISA and RT assay were normalized to vector-transfected or scrambled  
560 shRNA-transduced control and expressed as the level of virus production unless otherwise indicated.  
561 Statistical analysis was performed with Graphpad Prism 5. Data shows mean + standard error of mean  
562 from a minimum of 3 independent experiments.

563

564

## 565 **Acknowledgements**

566 We thank Áine McKnight for helpful discussions regarding this work and Greg Towers for useful  
567 comments on this manuscript. RDS was supported as a Barts and The London School of Medicine and  
568 Dentistry Early Career Research Fellow. We thank Frank Kirchhoff, Paul Bieniasz, and both the NIH and  
569 NIBSC AIDS reagent programmes for the provision of reagents.

570

571

## 572 **Author Contributions**

573 Designed the study: WYL, CL, RDS. Performed the experiments: WYL, RDS. Analyzed the data: WYL,  
574 RDS. Wrote the manuscript: WYL, RDS. Contributed reagents: CL.

575

## 576 **Competing Interests**

577 No competing interests are declared.

578

## 579 **References**

580

- 581 1. Malim, M. H. & Bieniasz, P. D. HIV Restriction Factors and Mechanisms of Evasion. *Cold Spring*  
582 *Harb Perspect Med* **2**, a006940 (2012).
- 583 2. Simon, V., Bloch, N. & Landau, N. R. Intrinsic host restrictions to HIV-1 and mechanisms of viral  
584 escape. *Nat. Immunol.* **16**, 546–553 (2015).
- 585 3. Kluge, S. F., Sauter, D. & Kirchhoff, F. SnapShot: Antiviral Restriction Factors. *Cell* **163**, 774–  
586 774.e1 (2015).
- 587 4. Liu, L. *et al.* A whole genome screen for HIV restriction factors. *Retrovirology* **8**, 94 (2011).
- 588 5. Kane, M. *et al.* MX2 is an interferon-induced inhibitor of HIV-1 infection. *Nature* **502**, 563–566  
589 (2013).
- 590 6. Goujon, C. *et al.* Human MX2 is an interferon-induced post-entry inhibitor of HIV-1 infection.  
591 *Nature* **502**, 559–562 (2013).
- 592 7. Rosa, A. *et al.* HIV-1 Nef promotes infection by excluding SERINC5 from virion incorporation.  
593 *Nature* **526**, 212–217 (2015).
- 594 8. Usami, Y., Wu, Y. & Göttlinger, H. G. SERINC3 and SERINC5 restrict HIV-1 infectivity and are

- 595 counteracted by Nef. *Nature* **526**, 218–223 (2015).
- 596 9. Brass, A. L. *et al.* The IFITM proteins mediate cellular resistance to influenza A H1N1 virus, West  
597 Nile virus, and dengue virus. *Cell* **139**, 1243–1254 (2009).
- 598 10. Lu, J. *et al.* The IFITM proteins inhibit HIV-1 infection. *J. Virol.* **85**, 2126–2137 (2011).
- 599 11. Schoggins, J. W. *et al.* A diverse range of gene products are effectors of the type I interferon  
600 antiviral response. *Nature* **472**, 481–485 (2011).
- 601 12. Wilson, S. J. *et al.* Inhibition of HIV-1 particle assembly by 2',3'-cyclic-nucleotide 3'-  
602 phosphodiesterase. *Cell Host Microbe* **12**, 585–597 (2012).
- 603 13. Bailey, C. C., Zhong, G., Huang, I.-C. & Farzan, M. IFITM-Family Proteins: The Cell's First Line  
604 of Antiviral Defense. *Annual Review of Virology* **1**, 261–283 (2014).
- 605 14. Compton, A. A. *et al.* IFITM proteins incorporated into HIV-1 virions impair viral fusion and  
606 spread. *Cell Host Microbe* **16**, 736–747 (2014).
- 607 15. Tartour, K. *et al.* IFITM proteins are incorporated onto HIV-1 virion particles and negatively  
608 imprint their infectivity. *Retrovirology* **11**, 103 (2014).
- 609 16. Tartour, K. *et al.* Interference with the production of infectious viral particles and bimodal  
610 inhibition of replication are broadly conserved antiviral properties of IFITMs. *PLoS Pathog* **13**,  
611 e1006610 (2017).
- 612 17. Amini-Bavil-Olyae, S. *et al.* The Antiviral Effector IFITM3 Disrupts Intracellular Cholesterol  
613 Homeostasis to Block Viral Entry. *Cell Host Microbe* **13**, 452–464 (2013).
- 614 18. Yu, J. *et al.* IFITM Proteins Restrict HIV-1 Infection by Antagonizing the Envelope Glycoprotein.  
615 *Cell Rep* **13**, 145–156 (2015).
- 616 19. Huang, I.-C. *et al.* Distinct patterns of IFITM-mediated restriction of filoviruses, SARS  
617 coronavirus, and influenza A virus. *PLoS Pathog* **7**, e1001258 (2011).
- 618 20. Wilkins, C. *et al.* IFITM1 is a tight junction protein that inhibits hepatitis C virus entry.  
619 *Hepatology* **57**, 461–469 (2013).
- 620 21. Savidis, G. *et al.* The IFITMs Inhibit Zika Virus Replication. *Cell Rep* **15**, 2323–2330 (2016).
- 621 22. Wang, Y. *et al.* The V3 Loop of HIV-1 Env Determines Viral Susceptibility to IFITM3  
622 Impairment of Viral Infectivity. *J. Virol.* **91**, e02441–16 (2017).
- 623 23. Kane, M. *et al.* Identification of Interferon-Stimulated Genes with Antiretroviral Activity. *Cell*  
624 *Host Microbe* **20**, 392–405 (2016).
- 625 24. Compton, A. A. *et al.* Natural mutations in IFITM3 modulate post-translational regulation and  
626 toggle antiviral specificity. *EMBO Rep.* e201642771–15 (2016). doi:10.15252/embr.201642771
- 627 25. Ding, S., Pan, Q., Liu, S.-L. & Liang, C. HIV-1 mutates to evade IFITM1 restriction. *Virology*  
628 **454-455**, 11–24 (2014).
- 629 26. Chutiwitoonchai, N. *et al.* Characteristics of IFITM, the newly identified IFN-inducible anti-HIV-  
630 1 family proteins. *Microbes Infect.* **15**, 280–290 (2013).
- 631 27. Qian, J. *et al.* Primate lentiviruses are differentially inhibited by interferon-induced  
632 transmembrane proteins. *Virology* **474**, 10–18 (2015).
- 633 28. Foster, T. L. *et al.* Resistance of Transmitted Founder HIV-1 to IFITM- Mediated Restriction. *Cell*  
634 *Host Microbe* 1–15 (2016). doi:10.1016/j.chom.2016.08.006
- 635 29. Maréchal, V., Clavel, F., Heard, J. M. & Schwartz, O. Cytosolic Gag p24 as an index of  
636 productive entry of human immunodeficiency virus type 1. *J. Virol.* **72**, 2208–2212 (1998).
- 637 30. Sloan, R. D. *et al.* Productive entry of HIV-1 during cell-to-cell transmission via dynamin-  
638 dependent endocytosis. *J. Virol.* **87**, 8110–8123 (2013).
- 639 31. Jolly, C., Booth, N. J. & Neil, S. J. D. Cell-cell spread of human immunodeficiency virus type 1  
640 overcomes tetherin/BST-2-mediated restriction in T cells. *J. Virol.* **84**, 12185–12199 (2010).
- 641 32. la Vega, de, M. *et al.* Inhibition of HIV-1 endocytosis allows lipid mixing at the plasma  
642 membrane, but not complete fusion. *Retrovirology* **8**, 99 (2011).
- 643 33. Ikeda, Y. *et al.* Continuous high-titer HIV-1 vector production. *Nat. Biotechnol.* **21**, 569–572  
644 (2003).
- 645 34. Kotsopoulou, E., Kim, V. N., Kingsman, A. J., Kingsman, S. M. & Mitrophanous, K. A. A Rev-



- 646 independent human immunodeficiency virus type 1 (HIV-1)-based vector that exploits a codon-  
647 optimized HIV-1 gag-pol gene. *J. Virol.* **74**, 4839–4852 (2000).
- 648 35. Kutluay, S. B. *et al.* Global changes in the RNA binding specificity of HIV-1 gag regulate virion  
649 genesis. *Cell* **159**, 1096–1109 (2014).
- 650 36. Pasquinelli, A. E. *et al.* The constitutive transport element (CTE) of Mason-Pfizer monkey virus  
651 (MPMV) accesses a cellular mRNA export pathway. *EMBO J.* **16**, 7500–7510 (1997).
- 652 37. Zhang, F. *et al.* Nef proteins from simian immunodeficiency viruses are tetherin antagonists. *Cell*  
653 *Host Microbe* **6**, 54–67 (2009).
- 654 38. Matheson, N. J. *et al.* Cell Surface Proteomic Map of HIV Infection Reveals Antagonism of  
655 Amino Acid Metabolism by Vpu and Nef. *Cell Host Microbe* **18**, 409–423 (2015).
- 656 39. Haller, C. *et al.* HIV-1 Nef and Vpu are functionally redundant broad-spectrum modulators of cell  
657 surface receptors, including tetraspanins. *J. Virol.* **88**, 14241–14257 (2014).
- 658 40. Fackler, O. T., d'Aloja, P., Baur, A. S., Federico, M. & Peterlin, B. M. Nef from Human  
659 Immunodeficiency Virus Type 1F12 Inhibits Viral Production and Infectivity. *J. Virol.* **75**, 6601–  
660 6608 (2001).
- 661 41. Collette, Y. & Olive, D. The primate lentivirus-encoded Nef protein can regulate several steps of  
662 the viral replication cycle. *Virology* **265**, 173–177 (1999).
- 663 42. Gummuluru, S., Kinsey, C. M. & Emerman, M. An in vitro rapid-turnover assay for human  
664 immunodeficiency virus type 1 replication selects for cell-to-cell spread of virus. *J. Virol.* **74**,  
665 10882–10891 (2000).
- 666 43. Schindler, M. *et al.* Nef-mediated suppression of T cell activation was lost in a lentiviral lineage  
667 that gave rise to HIV-1. *Cell* **125**, 1055–1067 (2006).
- 668 44. Lim, E. S., Wu, L. I., Malik, H. S. & Emerman, M. The function and evolution of the restriction  
669 factor Viperin in primates was not driven by lentiviruses. *Retrovirology* **9**, 55 (2012).
- 670 45. Yount, J. S., Karssemeijer, R. A. & Hang, H. C. S-palmitoylation and ubiquitination differentially  
671 regulate interferon-induced transmembrane protein 3 (IFITM3)-mediated resistance to influenza  
672 virus. *J. Biol. Chem.* **287**, 19631–19641 (2012).
- 673 46. Jia, R. *et al.* The N-terminal region of IFITM3 modulates its antiviral activity by regulating  
674 IFITM3 cellular localization. *J. Virol.* **86**, 13697–13707 (2012).
- 675 47. Jia, R. *et al.* The C-Terminal Sequence of IFITM1 Regulates Its Anti-HIV-1 Activity. *PLoS ONE*  
676 **10**, e0118794 (2015).
- 677 48. Hach, J. C., McMichael, T., Chesarino, N. M. & Yount, J. S. Palmitoylation on conserved and  
678 non-conserved cysteines of murine IFITM1 regulates its stability and anti-influenza A virus  
679 activity. *J. Virol.* (2013). doi:10.1128/JVI.00621-13
- 680 49. Collier, J. & Parker, R. General Translational Repression by Activators of mRNA Decapping. *Cell*  
681 **122**, 875–886 (2005).
- 682 50. Gao, G., Guo, X. & Goff, S. P. Inhibition of retroviral RNA production by ZAP, a CCCH-type  
683 zinc finger protein. *Science* **297**, 1703–1706 (2002).
- 684 51. Zhu, Y., Wang, X., Goff, S. P. & Gao, G. Translational repression precedes and is required for  
685 ZAP-mediated mRNA decay. *EMBO J.* **31**, 4236–4246 (2012).
- 686 52. Shin, Y. C., Bischof, G. F., Lauer, W. A. & Desrosiers, R. C. Importance of codon usage for the  
687 temporal regulation of viral gene expression. *Proc. Natl. Acad. Sci. U.S.A.* **112**, 14030–14035  
688 (2015).
- 689 53. Chang, D. D. & Sharp, P. A. Regulation by HIV Rev depends upon recognition of splice sites.  
690 *Cell* **59**, 789–795 (1989).
- 691 54. Grantham, P. & Perrin, P. AIDS virus and HTLV-I differ in codon choices. *Nature* **319**, 727–728  
692 (1986).
- 693 55. Kypr, J. & Mrázek, J. Unusual codon usage of HIV. *Nature* **327**, 20–20 (1987).
- 694 56. Takata, M. A. *et al.* CG dinucleotide suppression enables antiviral defence targeting non-self  
695 RNA. *Nature* **550**, 124–127 (2017).
- 696 57. Reid, D. W. & Nicchitta, C. V. Diversity and selectivity in mRNA translation on the endoplasmic

- 697 reticulum. *Nature Publishing Group* **16**, 221–231 (2015).
- 698 58. Li, K. *et al.* IFITM Proteins Restrict Viral Membrane Hemifusion. *PLoS Pathog* **9**, e1003124  
699 (2013).
- 700 59. Collins, K. L., Chen, B. K., Kalams, S. A., Walker, B. D. & Baltimore, D. HIV-1 Nef protein  
701 protects infected primary cells against killing by cytotoxic T lymphocytes. *Nature* **391**, 397–401  
702 (1998).
- 703 60. Schwartz, O., Maréchal, V., Le Gall, S., Lemonnier, F. & Heard, J. M. Endocytosis of major  
704 histocompatibility complex class I molecules is induced by the HIV-1 Nef protein. *Nat. Med.* **2**,  
705 338–342 (1996).
- 706 61. Vendrame, D., Sourisseau, M., Perrin, V., Schwartz, O. & Mammano, F. Partial inhibition of  
707 human immunodeficiency virus replication by type I interferons: impact of cell-to-cell viral  
708 transfer. *J. Virol.* **83**, 10527–10537 (2009).
- 709 62. Jolly, C. Cell-to-cell transmission of retroviruses: Innate immunity and interferon-induced  
710 restriction factors. *Virology* **411**, 251–259 (2011).
- 711 63. Kuhl, B. D. *et al.* Tetherin restricts direct cell-to-cell infection of HIV-1. *Retrovirology* **7**, 115  
712 (2010).
- 713 64. Casartelli, N. *et al.* Tetherin restricts productive HIV-1 cell-to-cell transmission. *PLoS Pathog* **6**,  
714 e1000955 (2010).
- 715 65. Park, H. *et al.* TAR RNA-binding protein is an inhibitor of the interferon-induced protein kinase  
716 PKR. *Proc Natl Acad Sci USA* **91**, 4713–4717 (1994).
- 717 66. Li, M. *et al.* Codon-usage-based inhibition of HIV protein synthesis by human schlafen 11. *Nature*  
718 **491**, 125–128 (2012).
- 719 67. Goodier, J. L., Pereira, G. C., Cheung, L. E., Rose, R. J. & Kazazian, H. H. The Broad-Spectrum  
720 Antiviral Protein ZAP Restricts Human Retrotransposition. *PLoS Genet.* **11**, e1005252–32 (2015).
- 721 68. Schmitz, C. *et al.* Lv2, a novel postentry restriction, is mediated by both capsid and envelope. *J.*  
722 *Virol.* **78**, 2006–2016 (2004).
- 723 69. Ogunkolade, B. W. *et al.* BORIS/CTCFL is an RNA-binding protein that associates with  
724 polysomes. *BMC Cell Biol.* **14**, 52 (2013).
- 725 70. Yamamoto, N. *et al.* Analysis of human immunodeficiency virus type 1 integration by using a  
726 specific, sensitive and quantitative assay based on real-time polymerase chain reaction. *Virus*  
727 *Genes* **32**, 105–113 (2006).
- 728 71. Sloan, R. D. *et al.* Transcription of preintegrated HIV-1 cDNA modulates cell surface expression  
729 of major histocompatibility complex class I via Nef. *J. Virol.* **85**, 2828–2836 (2011).
- 730 72. Wu, Y. & Marsh, J. W. Selective transcription and modulation of resting T cell activity by  
731 preintegrated HIV DNA. *Science* **293**, 1503–1506 (2001).

732  
733 **Figure Legends**

734  
735 **Figure 1. IFITMs inhibit HIV viral output and viral protein production in transfected cells.**

736 HEK293T cells were transfected with a titration of expression vectors for FLAG tagged IFITMs. (A)  
737 Levels of virus production were measured by p24 ELISA 48h post-transfection, and (B) cellular viral  
738 proteins and IFITMs were analyzed by immunoblotting.

739 HEK293T cells were transfected with 0.5µg of FLAG-tagged IFITM expression vectors and 0.5µg of  
740 HIV-1 NL4-3 proviral DNA. Levels of virus production from indicated HIV-1 proviral DNAs were

*IFITMs inhibit HIV-1 protein synthesis*

741 measured by (C) p24 ELISA and (D) reverse transcriptase (RT) activity assay and (E) immunoblotting of  
742 intracellular proteins 48h post-transfection. (F) Level of GFP expression in HEK293T cells co-transfected  
743 with 0.5 $\mu$ g CMV-driven GFP vector and 0.5 $\mu$ g IFITM-expression vectors or empty vectors measured by  
744 flow cytometry 48 hours post-transfection. (G) HIV-1 NL4-3 virus was produced from HEK293T cells  
745 transfected with vector or the indicated IFITMs in TZM-bl cells for 48 hours. Infectivity in TZM-bl cells  
746 was measured by luciferase activity assay 48 hours after infection with virus stock with equivalent p24  
747 concentration. Data show mean + S.E.M. of more than 3 independent experiments. All differences were  
748 assessed with Student's t-test and \* indicates  $p < 0.05$ .

749

750 **Figure 2. Inducible expression of IFITMs after viral entry inhibits HIV viral output and viral**  
751 **protein production in infected SupT1 cells.** (A) SupT1 cells were infected with the indicated dilutions  
752 of wild type HIV-1 NL4-3 inoculum and then treated with 1 $\mu$ g/ml doxycycline to induce IFITMs post-  
753 entry and 5 $\mu$ M AMD3100 to limit infection to a single cycle. At 72h post-infection levels of virus  
754 production were measured by p24 ELISA and differences assessed by Two-way ANOVA with  
755 Bonferroni's multiple comparison test. (B) Cellular viral proteins and IFITMs were analyzed by  
756 immunoblotting and (C) densitometry. Data show mean + S.E.M. of 3 independent experiments.  
757 Differences were assessed with Student's t-test and \* indicates  $p < 0.05$ .

758

759 **Figure 3. Knockdown of IFITMs rescues HIV-1 output and viral protein production in TZM-bl**  
760 **cells.** TZM-bl cells transduced with shRNAs against the indicated IFITMs or scrambled control (sc) were  
761 treated with 100IU/ml IFN $\beta$  for 72 hours. (A) Levels of IFITM expression were analyzed by  
762 immunoblotting. (B) Scrambled control TZM-bl cells were transfected with HIV-1 NL4-3 proviral DNA  
763 and treated with 100IU/ml IFN $\beta$ . Level of virus production was measured by p24 ELISA 72h post-  
764 transfection. TZM-bl cells transduced with shRNAs against the indicated IFITMs or scrambled control  
765 were transfected with HIV-1 NL4-3 proviral DNA and then treated with AMD3100 and IFN $\beta$  4h post-  
766 transfection. Level of virus output and viral proteins was measured by (C) p24 ELISA and (D)

767 immunoblotting, respectively, at 72 hours post-transfection. **(E)** Immunoblotting was further analyzed by  
768 densitometry. Data show mean + S.E.M. of 3 independent experiments. Differences were assessed with  
769 Student's t-test and \* indicates  $p < 0.05$ .

770

771 **Figure 4. Knockdown of IFITMs rescues HIV-1 output and viral protein production in primary**  
772 **human T cells.** Activated human CD4<sup>+</sup> T cells were transduced with lentivirus expressing the indicated  
773 shRNAs against IFITMs or scrambled sequence (sc) for 48 hours. **(A)** Level of IFITM expression was  
774 analyzed by immunoblotting and **(B)** densitometry; data was normalized to GAPDH and scrambled  
775 control.

776 Cells were then infected with HIV-1 89.6 with equivalent p24 concentrations. Cells were pre-treated with  
777 AMD3100 for 2 hours prior to infection and throughout. viral proteins in infected cells was analyzed by  
778 immunoblotting. Immediately after infection, cells were treated with trypsin and washed with PBS before  
779 intracellular staining of p24 and flow cytometry to measure virus uptake. Intracellular levels of p24 and  
780 median fluorescence intensity are shown in **(D)** representative histograms and **(E)** summary bar chart.  
781 Levels of **(F)** viral proteins in infected cells from one of the blood donors were shown by **(G)**  
782 densitometry. **(H)** Level of virus production was measured by p24 ELISA 72 hours post-infection and  
783 normalized. Data show mean + S.E.M. of 2 blood donors. Differences were assessed with Student's t-test  
784 and \* indicates  $p < 0.05$ .

785

786 **Figure 5. IFITM proteins inhibit HIV-1 protein synthesis.** **(A)** Level of viral transcripts in HEK293T  
787 cells transfected with HIV-1 NL4-3 and IFITM DNA was measured by qPCR 48 hours post-transfection  
788 and the data normalized. **(B)** Level of RNA in sucrose gradient fractions of HEK293T cells transfected  
789 with proviral HIV-1 NL4-3 DNA and expression vectors for IFITMs (or vector alone) was measured by  
790 absorbance at 254nm. **(C)** Level of ribosomal protein L7 was analyzed by immunoblotting to identify  
791 fractions enriched for polysomes. **(D)** Level of GAPDH RNA in IFITM-expressing cells was normalized  
792 to vector control in the indicated sucrose gradient fractions. Level of **(E)** unspliced, **(F)** singly-spliced and

*IFITMs inhibit HIV-1 protein synthesis*

793 **(G)** multiply-spliced viral transcripts in the indicated sucrose gradient fractions in **(B)** was analyzed by  
794 qPCR then normalized with the levels of GAPDH RNA and input RNA. Data shows mean + SEM of 3  
795 independent experiments. Differences were assessed by Student's t-test and \* denotes  $p < 0.05$  compared  
796 to vector control.

797

798 **Figure 6. HIV-1 RNA is a determinant of IFITM-mediated inhibition of protein synthesis. (A)**  
799 Normalized levels of unspliced viral transcripts (measured by qPCR) in the polysome fractions of  
800 HEK293T cells transfected with codon-optimized HIV-1 NL4-3 Gag DNA and IFITM expression vectors  
801 at 48h post-transfection. **(B)** Levels of extracellular p24 in HEK293T cells transfected with codon-  
802 optimized HIV-1 Gag DNA measured by p24 ELISA 48h post-transfection and normalized. Cellular  
803 levels of HIV-1 Gag (p55 and p24) were analyzed by **(C)** immunoblotting.

804 **(D)** Levels of virus production in HEK293T cells transfected with 0.5 $\mu$ g wild-type HIV-1 NL4-3 proviral  
805 DNA and 0.5 $\mu$ g IFITM-expression plasmids or empty vector was measured by p24 ELISA 48 hours post-  
806 transfection and normalized. Cellular levels of HIV-1 Gag (p55 and p24) in cells transfected were  
807 analyzed by **(E)** immunoblotting and **(F)** densitometry. Data show mean + SEM of 3 independent  
808 experiments and differences were assessed by Student's t-test, \* denotes  $p < 0.05$  compared to vector  
809 control.

810

811 **Figure 7. HIV Nef can help overcome IFITM-mediated restriction of protein synthesis. (A)** Level of  
812 virus production in HEK293T cells transfected with 0.5 $\mu$ g expression vectors for IFITMs and 0.5 $\mu$ g HIV-  
813 1 NL4-3 proviral DNA with a deletion ( $\Delta$ Nef) was measured by p24 ELISA 48 hours post-transfection  
814 and the data normalized, fold change of virus production compared to vector control is indicated.  
815 Differences were assessed with Student's t tests. **(B)** Intracellular level of p55/p24 and IFITMs was  
816 measured by immunoblotting.

817 **(C)** SupT1 cells were infected with the indicated dilutions of wild type or Nef-deleted ( $\Delta$ Nef) HIV-1  
818 NL4-3 inoculum and then treated with 1 $\mu$ g/ml doxycycline to induce IFITM expression post-entry and

*IFITMs inhibit HIV-1 protein synthesis*

819 5 $\mu$ M AMD3100 to limit infections to a single round. Level of virus production was measured by p24  
820 ELISA 72 hours post-infection. Differences were assessed with Two-way ANOVA and Bonferroni post-  
821 tests.

822 **(D)** C8166 cells constitutively expressing either vector control or IFITM1 were infected with either wild  
823 type or Nef-deleted ( $\Delta$ Nef) HIV-1 NL4-3. Levels of virus production were measured by p24 ELISA at the  
824 indicated time-points post-infection and were normalized to the levels of virus produced from vector  
825 controls. Differences were assessed with Two-way ANOVA.

826 **(E)** HEK293T cells were transfected with 0.5 $\mu$ g expression vectors for IFITMs and 0.5 $\mu$ g HIV-1 NL4-3  
827 proviral DNA with either wildtype NL4-3 *nef* or the indicated lentiviral *nef* alleles. Virus production was  
828 measured by p24 ELISA 48 hours post-transfection and the data normalized. Differences were assessed  
829 with Student's t tests.

830 **(F)** HEK293T cells were transfected with  $\Delta$ Nef HIV-1 NL4-3 proviral DNA, expression vectors for  
831 IFITMs and an increasing proportion of HIV-1 Nef-encoding vector versus empty vector in a fixed total  
832 quantity of 1 $\mu$ g. Level of virus production was measured by p24 ELISA 48 hours post-transfection, while  
833 levels of viral proteins and IFITM-FLAG expression was analyzed by **(G)** immunoblotting. Differences  
834 were assessed by Student's t-test. All data show mean + SEM from 3 independent experiments and \*  
835 denotes  $p < 0.05$ .

836

837 **Supporting Information Figure legends**

838 **Supporting Fig 1. IFITMs inhibit HIV-1, HIV-2 and SIV viral output.** Levels of virus production of  
839 HEK293T cells transfected with 0.5 $\mu$ g expression vectors of IFITMs and 0.5 $\mu$ g **(A)** HIV-2 strains or **(B)**  
840 SIVs (AGM –African Green Monkey, CPZ – Chimpanzee, MAC – Macaque) proviral DNA were  
841 measured by RT activity assay and normalized. **(C)** Levels of virus production of HEK293T cells  
842 transfected with 0.5 $\mu$ g expression vectors of African Green Monkey IFITM1 and 0.5 $\mu$ g proviral DNA of  
843 HIV-1 were measured by p24 ELISA and normalized. Data shows mean+SEM of 3 independent  
844 experiments. Differences were analyzed with Student's t-test and \* indicates  $p < 0.05$ .

845

846 **Supporting Fig 2. AMD3100 blocks HIV-1 NL4-3 entry in SupT1 cells.**  $1 \times 10^6$ /ml SupT1 cells were  
847 treated with 5 $\mu$ M AMD3100 or DMSO for 2 hours at 37°C and then left untreated or infected with HIV-1  
848 NL4-3 with p24 concentration of 100ng/ml for 2 hours by spinoculation and 1 hour incubation at 37°C.  
849 Cells were then washed 3 times with PBS. Levels of virus production were measured by p24 ELISA 48  
850 hours post-transfection. Mean fluorescence intensity of IFITMs in **(B)** human monocyte-derived  
851 macrophages (MDMs, day 7) and **(C)** human CD4<sup>+</sup> T cells treated with indicated concentrations of IFN $\beta$   
852 for 24 hours; **(D)** HEK293T cells transfected with 0.5 $\mu$ g IFITM-encoding plasmids and 0.5 $\mu$ g HIV-1  
853 proviral DNA for 48 hours and **(E)** SupT1 cells treated with 1 $\mu$ g/ml doxycycline for 48 hours to induce  
854 expression of the indicated IFITMs, was measured by intracellular staining of IFITMs with monoclonal  
855 antibodies and flow cytometry. Data shows mean+SEM of 3 independent experiments.

856

857 **Supporting Fig 3. Substituting the MPMV CTE for the HIV-1 RRE does not affect IFITM-**  
858 **mediated inhibition of HIV-1 production.** HEK293T cells were transfected with expression vectors for  
859 IFITMs and HIV-1 NL4-3 DNA (wild type [*i.e.* RRE bearing], MPMV CTE only or CTE+RRE). Level  
860 of viral production was measured by p24 ELISA 48 hours post-transfection and normalized. Data shows  
861 mean+SEM of 3 independent experiments. Differences were analyzed with Student's t-test and \*  
862 indicates p<0.05.

863

864 **Supporting Fig 4. (A) HIV-1 Nef does not overcome IFITM-mediated inhibition of early viral**  
865 **replication steps.** C8166 CD4<sup>+</sup> T-cells were transduced to constitutively overexpress IFITM1-3. Cells  
866 were then infected with the wild type pBR4-3-eGFP-Nef virus or pBR4-3-eGFP- $\Delta$ Nef virus. Cells were  
867 measured for GFP expression 48h post-infection by FACS to determine infection rate. Data shows fold-  
868 change in restriction of GFP infection rates during IFITM expression relative to empty vector control  
869 cells. **(B)** Levels of p55 and p24 in immunoblotting of Fig. 7B were quantified by densitometry and  
870 normalized to  $\beta$ -actin. Data shows mean + SEM of the ratio of viral proteins to  $\beta$ -actin of 3 independent

*IFITMs inhibit HIV-1 protein synthesis*

871 experiments and differences were assessed by Student's t-test, \* denotes  $p < 0.05$ . **(C) Increasing Nef**  
872 **levels rescues HIV-1 protein production during IFITM expression.** HEK293T cells were transfected  
873 with  $\Delta$ Nef HIV-1 NL4-3 proviral DNA, expression vectors for IFITMs and an increasing proportion of  
874 HIV-1 Nef-encoding vector versus empty vector in a fixed total quantity. Levels of viral proteins and  
875 IFITM-FLAG expression was analyzed by immunoblotting and densitometry. Data show mean + SEM of  
876 3 independent experiments and differences were assessed by Student's t-test, \* denotes  $p < 0.05$ .



**Figure 1**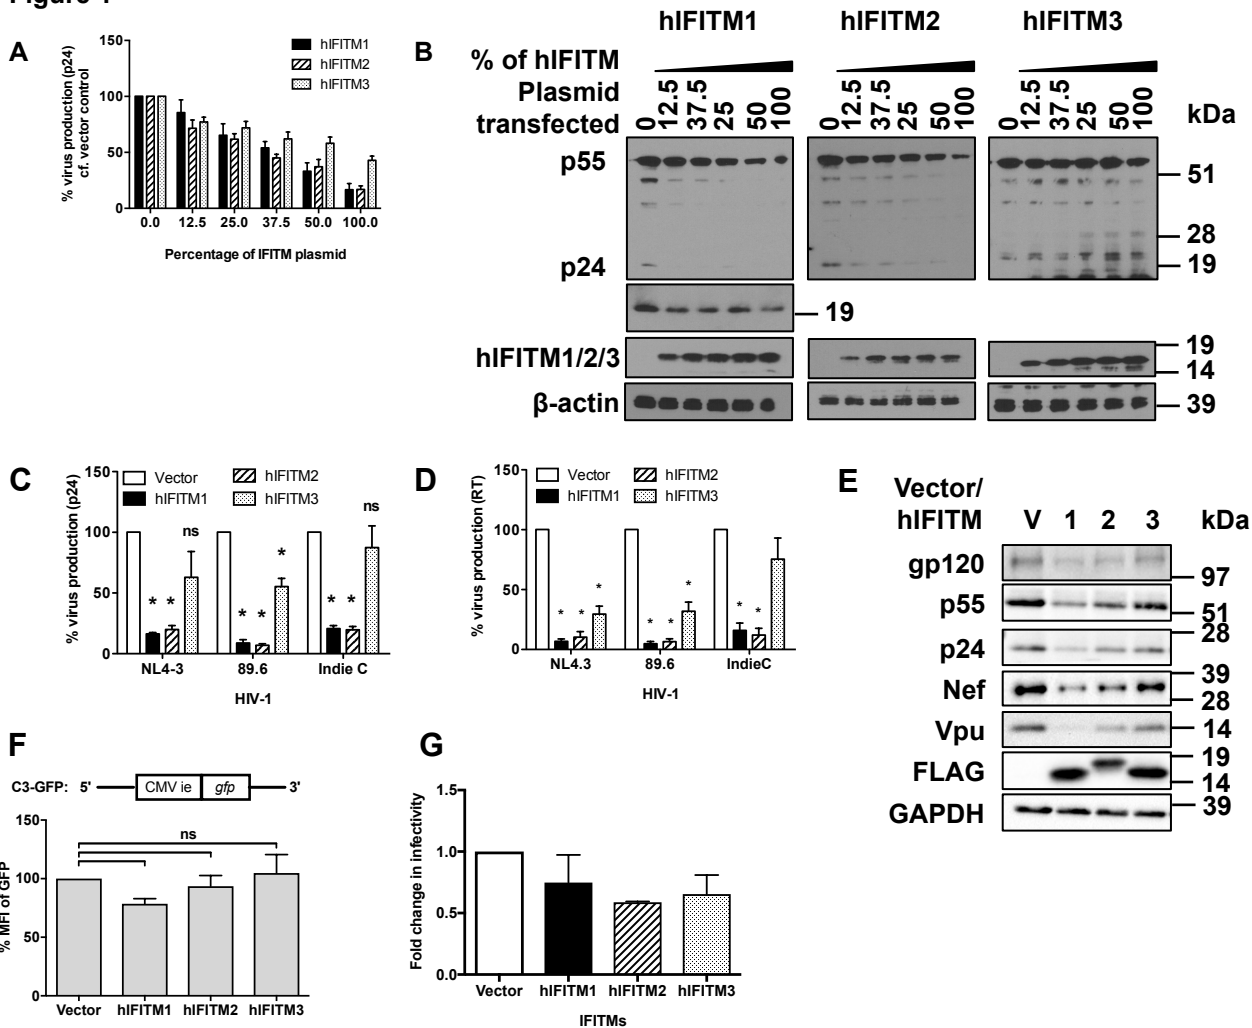

**Figure 2**

**A**

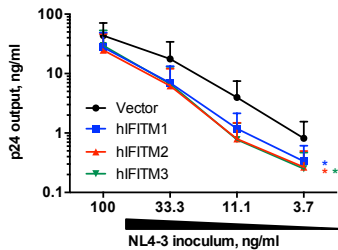

**B**

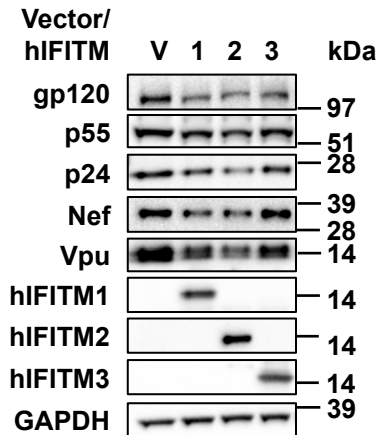

**C**

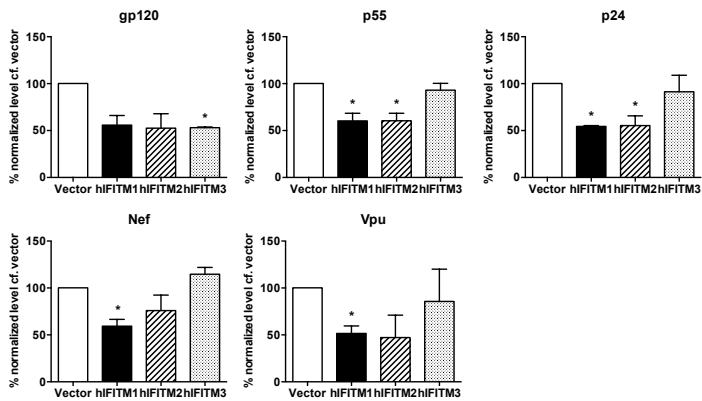

**Figure 3**

**A**

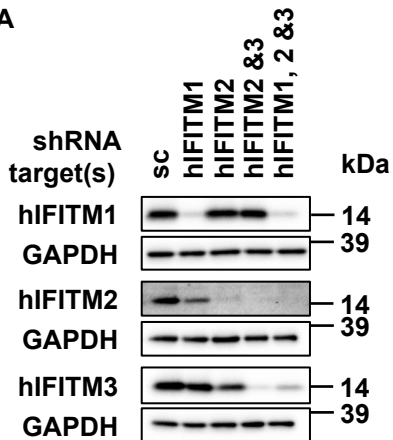

**B**

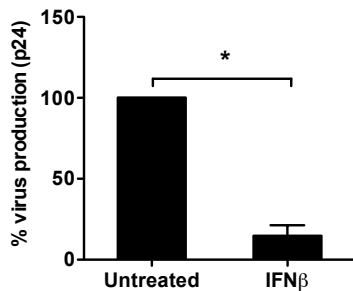

**C**

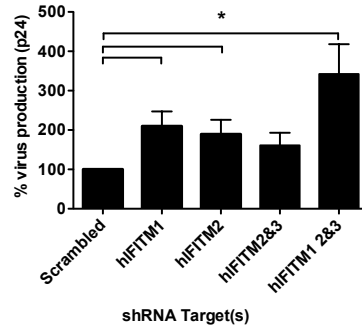

**D**

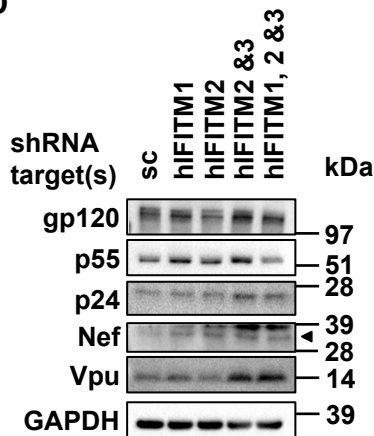

**E**

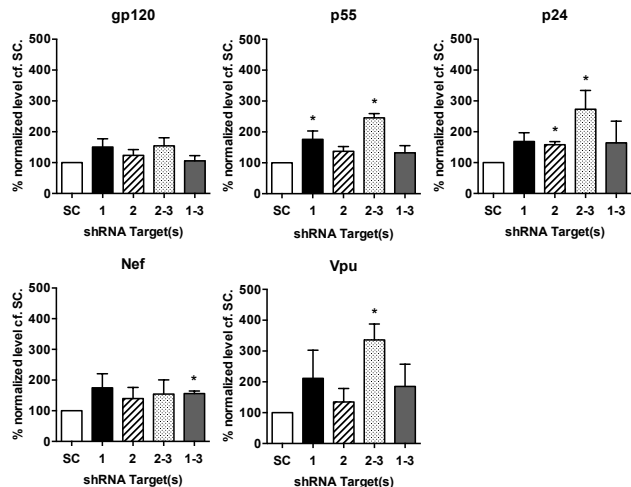

**Figure 4****A**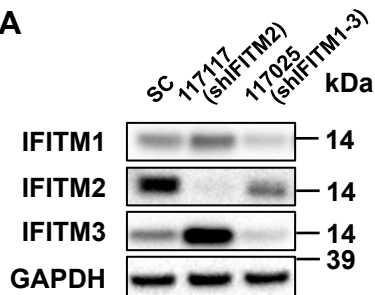**B**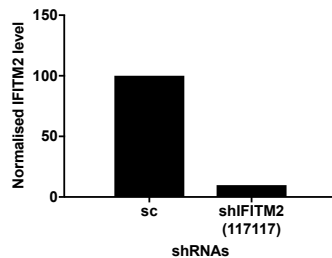**C**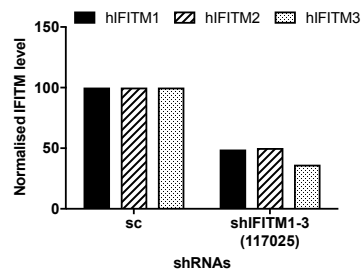**D****89.6+AMD3100**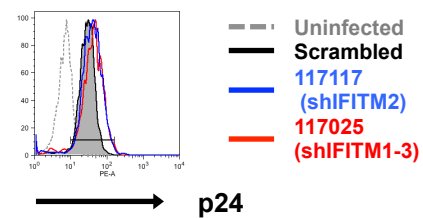**E**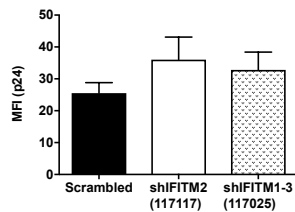**F**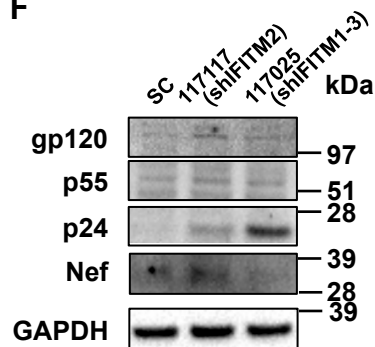**G**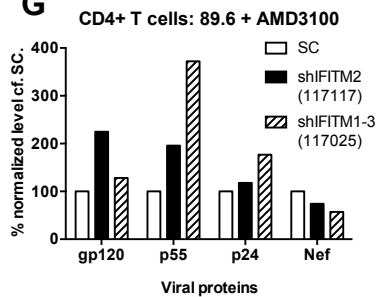**H**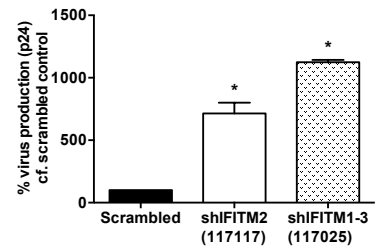

**Figure 5****A**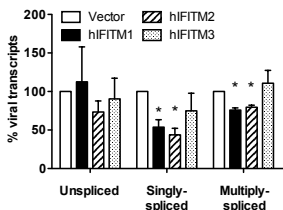**B**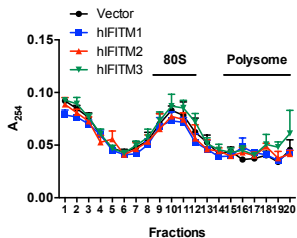**C**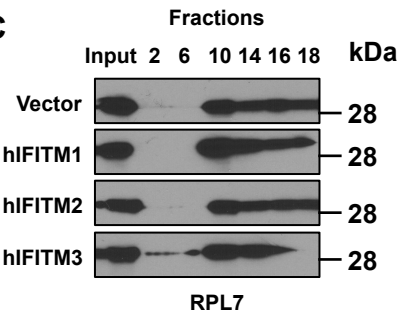**D**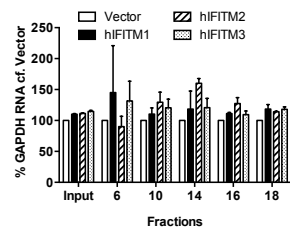**E**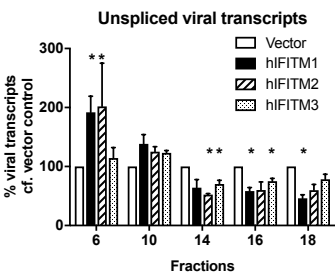**F**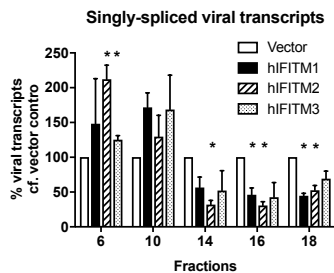**G**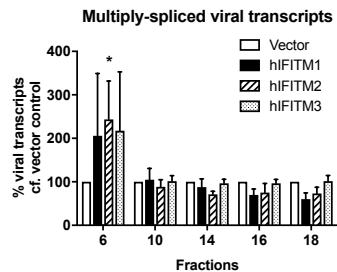

**Figure 6**

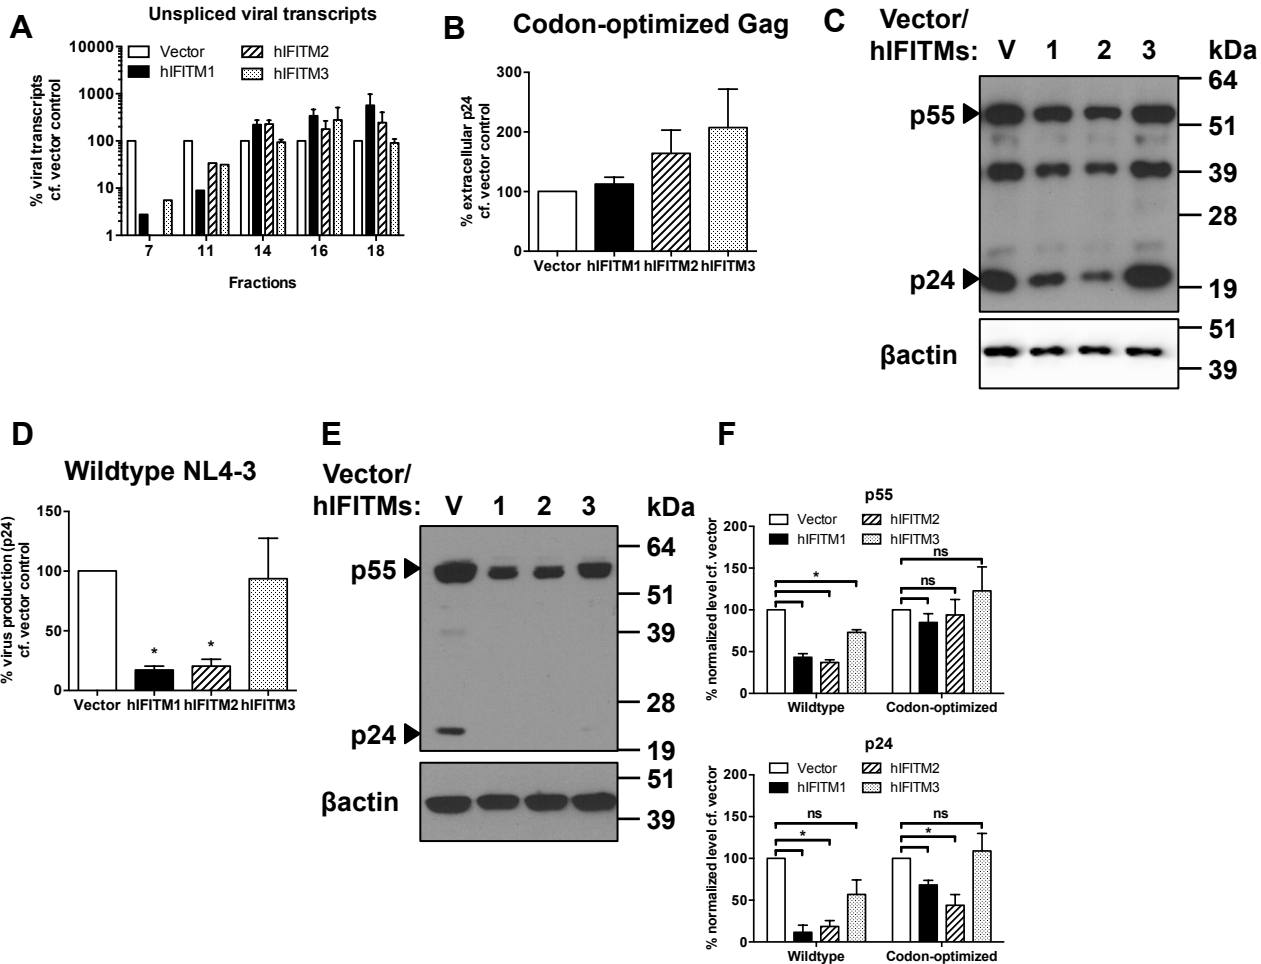

**Figure 7**

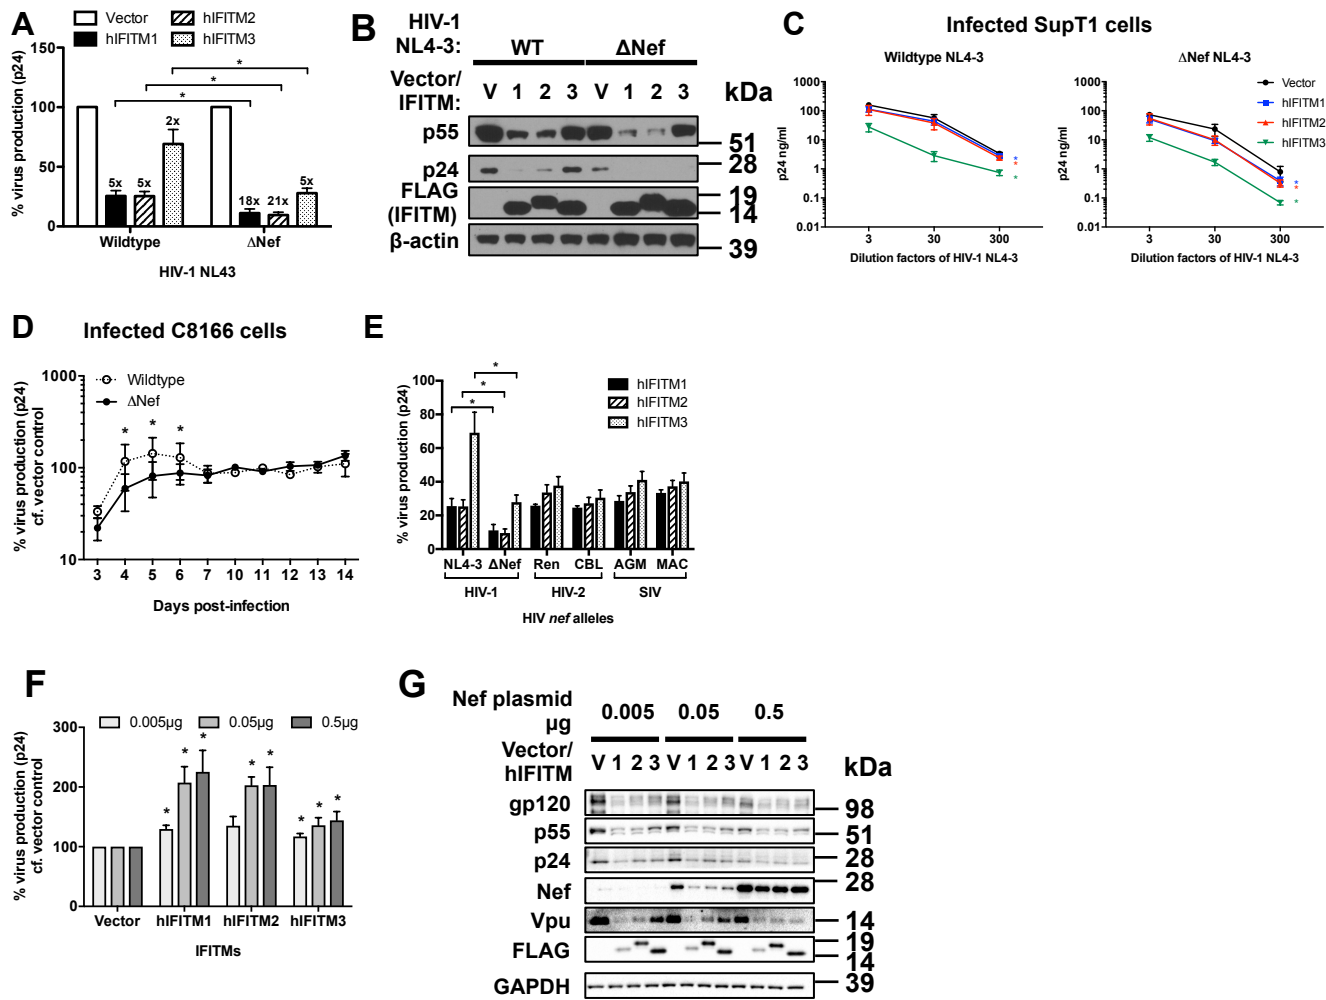

Source: https://www.biorxiv.org/content/10.1101/201525v2.full.pdf
